# Supplementary material for: A novel bridged nucleoside bearing a conformationally switchable sugar moiety in response to redox changes
Source: Royal Society of Chemistry journal article supplement (doi:10.1039/c0cc02484h), 2010-01-01
Supplement: c0cc02484h.pdf [file c0cc02484h.pdf]

Supporting Information

## **A Novel Bridged Nucleoside Bearing a Conformationally Switchable Sugar Moiety in Response to Redox Changes**

Takeshi Baba, Tetsuya Kodama, Kazuto Mori, Takeshi Imanishi and Satoshi Obika\*

*\*Graduate School of Pharmaceutical Sciences, Osaka University, 1-6 Yamadaoka, Suita, Osaka, 565-0871, Japan.*

*Fax: +81 6 6879 8204; Tel: +81 6 6879 8200*

*E-mail: obika@phs.osaka-u.ac.jp*

### **Contents**

|                                                                                 |     |
|---------------------------------------------------------------------------------|-----|
| 1. General methods                                                              | S2  |
| 2. Synthesis of new compounds                                                   | S2  |
| 3. <sup>1</sup> H- and <sup>13</sup> C-NMR spectra of new compounds             | S7  |
| 4. Reactions of monomer <b>8</b> using reducing and oxidating reagents          | S17 |
| 5. Mass spectrum of BNA monomer <b>8</b> , <b>9</b> and <b>8-D</b> , <b>9-D</b> | S25 |
| 6. The selected sugar parameters obtained by X-ray crystallographic analysis    | S30 |
| 7. Parameters of optimized monomer <b>9</b>                                     | S31 |

## 1. General Methods

Melting points are uncorrected. All moisture-sensitive reactions were carried out in well-dried glassware under a N<sub>2</sub> atmosphere. Dichloromethane, DMF and pyridine were distilled from CaH<sub>2</sub>. <sup>1</sup>H-NMR (500, 400, 300 and 270 MHz) and <sup>13</sup>C-NMR (126, 75.5 and 67.8 MHz) were recorded on JEOL JNM-LA-500, JNM-ECS-400, JNM-AL-300 or JNM-EX-270 spectrometers. Chemical shift are reported in parts per million downfield from internal tetramethylsilane (0.00 ppm) and residual solvent for <sup>1</sup>H-NMR or chloroform-*d*<sub>1</sub> (77.0 ppm), methanol- *d*<sub>4</sub> (49.0 ppm) for <sup>13</sup>C-NMR. IR spectra were recorded on a JASCO FT/IR-200 or JASCO FT/IR-4200 spectrometers. Optical rotations were recorded on a JASCO DIP-370 instrument. Mass spectra were measured on FINNIGAN LCQ Deca XP MAX, JEOL JMS-600, JMS-700 or JMS-D300 mass spectrometers. For column chromatography, silica gel PSQ-100B, FL-100D was used. For flash column chromatography, silica gel FL-60D was used.

## 2. Synthesis of new compounds

### Compound 2

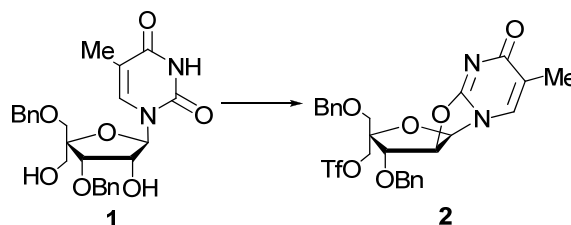

Under a N<sub>2</sub> atmosphere, to a solution of compound **1** (187 mg, 0.399 mmol), *N,N*-dimethyl-4-aminopyridine (73.2 mg, 0.599 mmol) and triethylamine (0.279 mL, 2.00 mmol) in dichloromethane (8.0 mL) at -78 °C was added trifluoromethanesulfonyl chloride (0.127 mL, 1.20 mmol) and resulting mixture was stirred at -78 °C for 1 h. After addition of trifluoromethanesulfonyl chloride (0.030 mL, 0.279 mmol) to the reaction mixture, the mixture was stirred at -78 °C for 1 h. Furthermore trifluoromethanesulfonyl chloride (0.030 mL, 0.279 mmol) was added to the mixture and the mixture was stirred at -78 °C for 1 h. After being acidified by addition of aqueous diluted sulfuric acid at 0 °C, the reaction mixture was diluted with dichloromethane, washed with water, saturated aqueous NaHCO<sub>3</sub> and brine, dried over Na<sub>2</sub>SO<sub>4</sub>, and concentrated. The crude was purified by column chromatography (AcOEt) to give compound **2** (167 mg, 0.287 mmol, 72%) as a white foam.

mp 120–123 °C.  $[\alpha]_D^{26}$  -11.2 (c 1.0, CH<sub>2</sub>Cl<sub>2</sub>). IR  $\nu_{\max}$  (KBr): 1636 cm<sup>-1</sup>. <sup>1</sup>H-NMR (270 MHz, CDCl<sub>3</sub>) :  $\delta$  1.98 (3 H, s), 3.21 (1 H, d,  $J$  = 6 Hz), 3.38 (1 H, d,  $J$  = 6 Hz), 4.32–4.44 (3 H, m), 4.53–4.82 (4 H, m), 5.26 (1 H, d,  $J$  = 6 Hz), 6.20 (1 H, d,  $J$  = 6 Hz), 7.13–7.35 (11 H, m). <sup>13</sup>C-NMR (67.8 MHz, CDCl<sub>3</sub>) :  $\delta$  14.0, 69.0, 73.3, 73.7, 74.7, 83.8, 86.2, 87.6, 89.7, 118.3 (q,  $J$  = 319 Hz), 119.2, 127.6, 127.7, 128.0, 128.0, 128.2, 128.3, 128.4, 128.5, 128.6, 128.6, 130.1, 135.2, 136.2, 158.9, 171.7. MS (FAB)  $m/z$  583 (M+H<sup>+</sup>), HRMS (FAB): Calcd for C<sub>26</sub>H<sub>26</sub>F<sub>3</sub>N<sub>2</sub>O<sub>8</sub>S (M+H<sup>+</sup>): 583.1362. Found: 583.1346.

### Compound 3

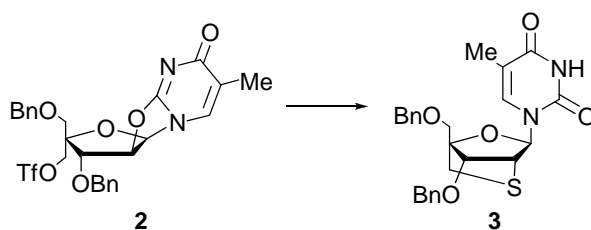

Under a N<sub>2</sub> atmosphere, to a solution of compound **2** (20.0 mg, 0.034 mmol) in *N*-methylpyrrolidone (0.7 mL) was added potassium thioacetate (11.6 mg, 0.101 mmol) and resulting mixture was stirred at room temperature for 1 h. After addition of potassium thioacetate (7.7 mg, 0.067 mmol) to the reaction mixture, the mixture was stirred at 70 °C for 3.5 h and 120 °C for 15 h. After addition of the reaction mixture into brine, the mixture was extracted by dichloromethane and dried over Na<sub>2</sub>SO<sub>4</sub>, and concentrated. The obtained crude was purified by column chromatography (*n*-hexane/AcOEt = 2/1) to give compound **3** (11.9 mg, 0.026 mmol, 75%) as a yellow foam.

mp 62–65 °C.  $[\alpha]_D^{22}$  98.1 (c 1.0, CH<sub>2</sub>Cl<sub>2</sub>). IR  $\nu_{\max}$  (KBr): 1687 cm<sup>-1</sup>. <sup>1</sup>H-NMR (300 MHz, CDCl<sub>3</sub>) :  $\delta$  1.44 (3 H, d,  $J$  = 1 Hz), 2.79 (1 H, d,  $J$  = 10 Hz), 3.02 (1 H, d,  $J$  = 10 Hz), 3.72 (1 H, d,  $J$  = 2 Hz), 3.78 (1 H, d,  $J$  = 11 Hz), 3.87 (1 H, d,  $J$  = 11 Hz), 4.20 (1 H, d,  $J$  = 2 Hz), 4.47 (1 H, d,  $J$  = 11 Hz), 4.59 (2 H, s), 4.63 (1 H, d,  $J$  = 11 Hz), 5.85 (1 H, s), 7.26–7.36 (10 H, m), 7.77 (1 H, d,  $J$  = 1 Hz), 8.29 (1 H, brs). <sup>13</sup>C-NMR (75.5 MHz, CDCl<sub>3</sub>) :  $\delta$  11.8, 35.6, 49.5, 66.9, 71.7, 73.7, 76.4, 88.5, 90.6, 109.3, 127.7, 127.8, 127.9, 128.0, 128.3, 128.5, 135.3, 136.8, 137.1, 150.2, 164.3. MS (FAB)  $m/z$  467 (M+H<sup>+</sup>). HRMS (FAB): Calcd for C<sub>25</sub>H<sub>27</sub>N<sub>2</sub>O<sub>5</sub>S (M+H<sup>+</sup>): 467.1641. Found: 467.1635.

## Compound 6

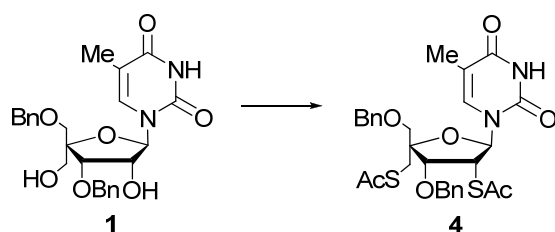

Under a  $N_2$  atmosphere, to a solution of compound **1** (2.00 g, 4.27 mmol), *N,N*-dimethyl-4-aminopyridine (782 mg, 6.41 mmol) and triethylamine (2.98 mL, 21.3 mmol) in dichloromethane (80 mL) at  $-78$  °C was added trifluoromethanesulfonyl chloride (1.36 mL, 12.8 mmol) and resulting mixture was stirred at  $-78$  °C for 2 h. After being acidified by addition of aqueous diluted sulfuric acid at  $0$  °C, the reaction mixture was diluted with dichloromethane, washed with water, saturated aqueous  $NaHCO_3$  and brine, dried over  $Na_2SO_4$ , and concentrated to give a crude mixture (2.77 g) as a pale yellow solid. To a solution of the crude in 1,4-dioxane (80 mL) was added 1M aqueous sodium hydroxide solution (12.8 mL, 12.8 mmol) and the resulting mixture was stirred at room temperature for 75 min. After being acidified by addition of aqueous diluted sulfuric acid at  $0$  °C, the reaction mixture was diluted with dichloromethane, washed with water, saturated aqueous  $NaHCO_3$  and brine, dried over  $Na_2SO_4$ , and concentrated to give a crude mixture (2.80 g) as a pale yellow solid. Under a  $N_2$  atmosphere, trifluoromethanesulfonic anhydride (1.44 mL, 8.54 mmol) was added to a stirred solution of the crude, *N,N*-dimethyl-4-aminopyridine (2.09 g, 17.1 mmol) and pyridine (3.45 mL, 42.7 mmol) in dichloromethane (120 mL) at  $0$  °C and the mixture was stirred for 1.5 h. After being acidified by addition of aqueous diluted sulfuric acid at  $0$  °C, the reaction mixture was diluted with dichloromethane, washed with water, saturated aqueous  $NaHCO_3$  and brine, dried over  $Na_2SO_4$ , and concentrated to give a crude mixture (3.68 g) as a brown solid. To a solution of the obtained crude in *N,N*-dimethylformamide (80 mL) was added potassium thioacetate (1.46 g, 12.8 mmol) and the resulting mixture was stirred at room temperature for 90 min. After addition of water, the reaction mixture was diluted with diethylether, washed with water and brine, dried over  $MgSO_4$ , and concentrated. The crude was roughly purified by column chromatography (*n*-hexane/ $AcOEt$  = 3/2) and purified further by column chromatography ( $CHCl_3$ / $AcOEt$  = 20/1) to give compound **4** (994 mg, 1.70 mmol, 40%) as a brown foam.

mp 52–54 °C.  $[\alpha]_{\text{D}}^{25}$  -23.0 (c 1.0, CH<sub>2</sub>Cl<sub>2</sub>). IR  $\nu_{\text{max}}$  (KBr): 1694 cm<sup>-1</sup>. <sup>1</sup>H-NMR (270 MHz, CDCl<sub>3</sub>):  $\delta$  1.51 (3 H, d,  $J$  = 1 Hz), 2.33 (3 H, s), 2.35 (3 H, s), 3.14 (1 H, d,  $J$  = 14 Hz), 3.30 (1 H, d,  $J$  = 14 Hz), 3.55 (1 H, d,  $J$  = 10 Hz), 3.73 (1 H, d,  $J$  = 10 Hz), 4.26 (1 H, d,  $J$  = 6 Hz), 4.54–4.76 (4 H, m), 4.78 (1 H, d,  $J$  = 11 Hz), 6.26 (1 H, d,  $J$  = 10 Hz), 7.33–7.41 (10 H, m), 7.50 (1 H, d,  $J$  = 1 Hz), 8.07 (1 H, brs). <sup>13</sup>C-NMR (67.8 MHz, CDCl<sub>3</sub>):  $\delta$  12.0, 30.4, 30.5, 31.4, 50.4, 73.3, 73.7, 75.2, 81.2, 86.6, 87.8, 111.4, 127.4, 128.0, 128.1, 128.2, 128.5, 128.7, 135.7, 136.6, 137.1, 150.6, 163.5, 193.9, 195.3. MS (FAB)  $m/z$  585 (M+H<sup>+</sup>). HRMS (FAB): Calcd for C<sub>29</sub>H<sub>33</sub>N<sub>2</sub>O<sub>7</sub>S<sub>2</sub> (M+H<sup>+</sup>): 585.1729. Found: 585.1733.

### Compound 7

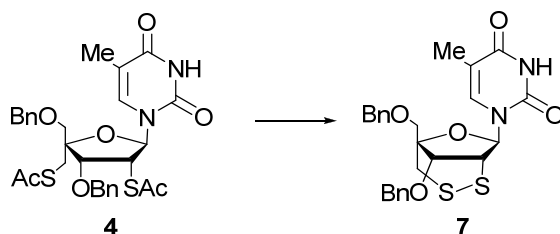

To a solution of compound **4** (100 mg, 0.171 mmol) in methanol (17 mL) was added 28% aqueous ammonia solution (1.00 mL, 16.5 mmol) and resulting mixture was stirred at room temperature for 20 h. The reaction mixture was concentrated and was diluted with dichloromethane, washed with water and brine, dried over Na<sub>2</sub>SO<sub>4</sub>, and concentrated to give compound **7** (85.0 mg, 0.170 mmol, quant.) as a white foam.

mp 82–85 °C.  $[\alpha]_{\text{D}}^{26}$  +38.6 (c 1.0, CH<sub>2</sub>Cl<sub>2</sub>). IR  $\nu_{\text{max}}$  (KBr): 1685 cm<sup>-1</sup>. <sup>1</sup>H-NMR (270 MHz, CDCl<sub>3</sub>):  $\delta$  1.47 (3 H, d,  $J$  = 1 Hz), 2.15 (1 H, d,  $J$  = 14 Hz), 3.51 (1 H, d,  $J$  = 11 Hz), 3.58 (1 H, d,  $J$  = 14 Hz), 3.64 (1 H, d,  $J$  = 11 Hz), 3.64 (1 H, d,  $J$  = 6 Hz), 4.26 (1 H, d,  $J$  = 6 Hz), 4.42 (1 H, d,  $J$  = 12 Hz), 4.52 (1 H, d,  $J$  = 12 Hz), 4.57 (1 H, d,  $J$  = 12 Hz), 4.72 (1 H, d,  $J$  = 12 Hz), 6.64 (1 H, s), 7.21–7.38 (10 H, m), 7.91 (1 H, d,  $J$  = 1 Hz), 8.36 (1 H, brs). <sup>13</sup>C-NMR (67.8 MHz, CDCl<sub>3</sub>):  $\delta$  12.1, 32.9, 49.9, 70.2, 71.0, 71.4, 73.6, 84.5, 89.5, 109.9, 127.7, 127.8, 128.0, 128.1, 128.4, 128.6, 135.4, 136.8, 136.9, 149.9, 163.8. MS (FAB)  $m/z$  499 (M+H<sup>+</sup>). HRMS (FAB): Calcd for C<sub>25</sub>H<sub>28</sub>N<sub>2</sub>O<sub>5</sub>S<sub>2</sub> (M+H<sup>+</sup>): 499.1361. Found: 499.1357.

## Compound 8

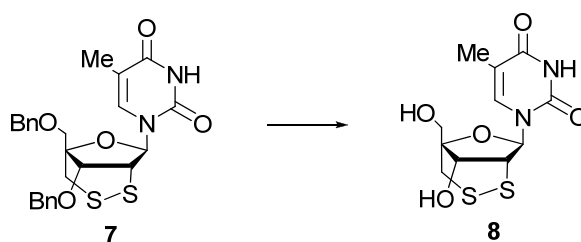

Under a N<sub>2</sub> atmosphere, to a solution of compound **7** (764 mg, 1.53 mmol) in dichloromethane (6.0 mL) at -78 °C was added 1M boron trichloride in dichloromethane solution (30.0 mL, 30.0 mmol) and resulting mixture was stirred at -60 °C for 68 h. After addition of methanol at -60 °C, the reaction mixture was concentrated. The crude was purified by column chromatography (CHCl<sub>3</sub>/MeOH = 10/1 to 2/1 ) to give compound **8** (347 mg, 1.09 mmol, 71%) as a pale brown solid.

The crystal of compound **8** for X-ray crystallographic analysis was obtained by recrystallization from methanol.

mp 210–212 °C (MeOH). [ $\alpha$ ]<sub>D</sub><sup>24</sup> -67.5 (c 1.0, MeOH). IR  $\nu_{\max}$  (KBr): 1681, 3134 cm<sup>-1</sup>. <sup>1</sup>H-NMR (300 MHz, CD<sub>3</sub>OD) :  $\delta$  1.87 (3 H, d,  $J$  = 1 Hz), 2.26 (1 H, d,  $J$  = 13 Hz), 3.43 (1 H, d,  $J$  = 13 Hz), 3.59 (1 H, d,  $J$  = 12 Hz), 3.60 (1 H, d,  $J$  = 6 Hz), 3.65 (1 H, d,  $J$  = 12 Hz), 4.37 (1 H, d,  $J$  = 6 Hz), 6.59 (1 H, s), 8.27 (1 H, d,  $J$  = 1 Hz). <sup>13</sup>C-NMR (67.8 MHz, CD<sub>3</sub>OD) :  $\delta$  12.6, 32.8, 54.1, 63.6, 65.1, 86.1, 90.0, 110.5, 137.8, 152.1, 166.6. MS (FAB)  $m/z$  319 (M+H<sup>+</sup>). Anal. Calcd for C<sub>11</sub>H<sub>14</sub>N<sub>2</sub>O<sub>5</sub>S<sub>2</sub>·H<sub>2</sub>O: C, 39.28; H, 4.79; N, 8.33; S, 19.06. Found: C, 39.27; H, 4.73; N, 8.27; S, 18.70.

### 3. <sup>1</sup>H- and <sup>13</sup>C-NMR spectra of new compounds

#### Compound 2 (<sup>1</sup>H-NMR)

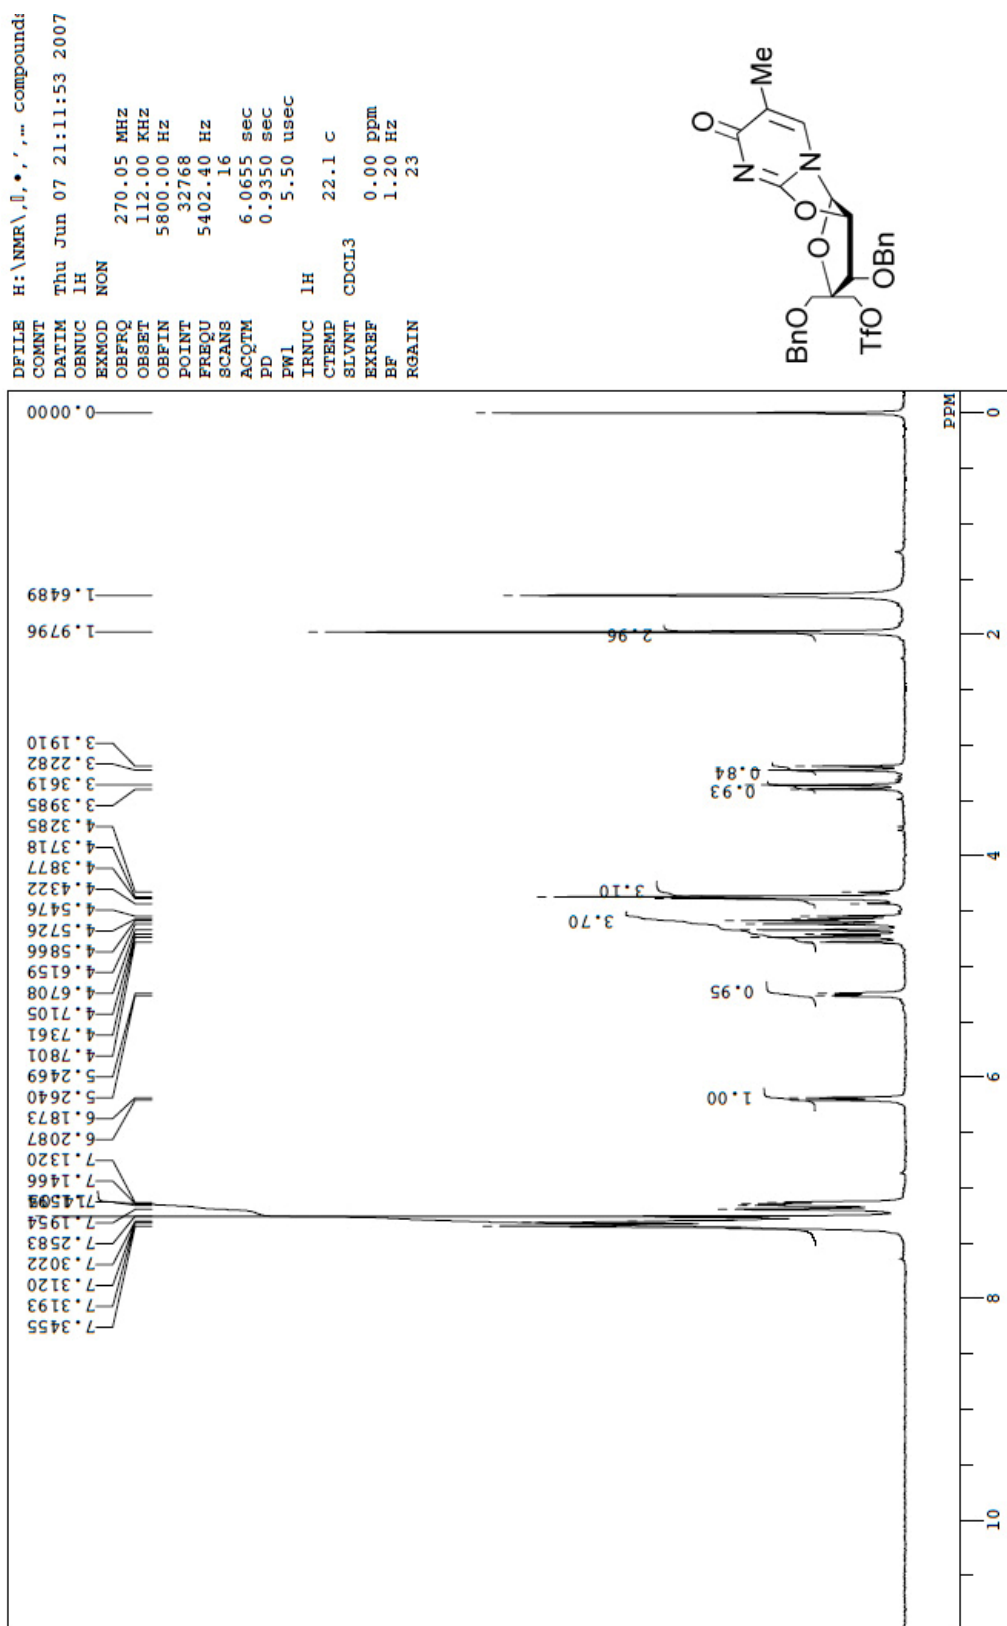

### Compound 2 (<sup>13</sup>C-NMR)

H:\NMR\.,.,',... compound:  
DFIILE  
COMNT  
DATIM Fri Jun 08 15:26:32 2007  
OBNUC 13C  
EXMOD ECM  
OBFRQ 67.80 MHz  
OBSET 135.00 KHZ  
OBFIN 5200.00 Hz  
POINT 32768  
FREQU 18315.00 Hz  
SCANS 730  
ACQTM 1.7891 sec  
PD 1.2110 sec  
PW1 4.00 usec  
IRNUC 1H  
CTEMP 23.1 C  
SLVNT CDCL3  
EXREF 77.00 ppm  
BF 0.12 Hz  
RGAIN 26

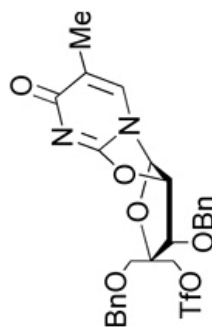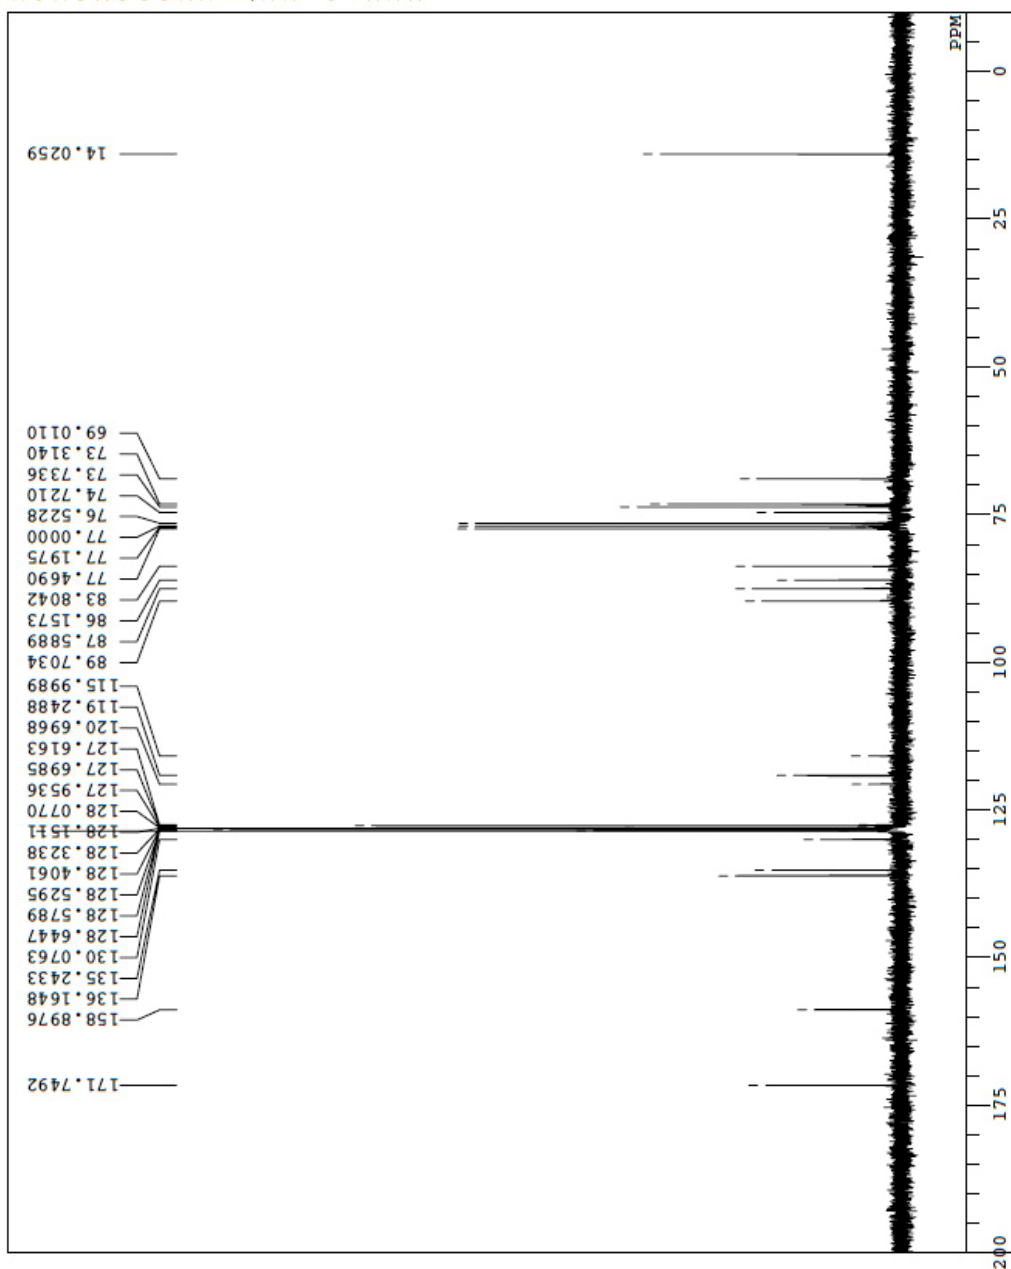



Compound **3** (<sup>1</sup>H-NMR)

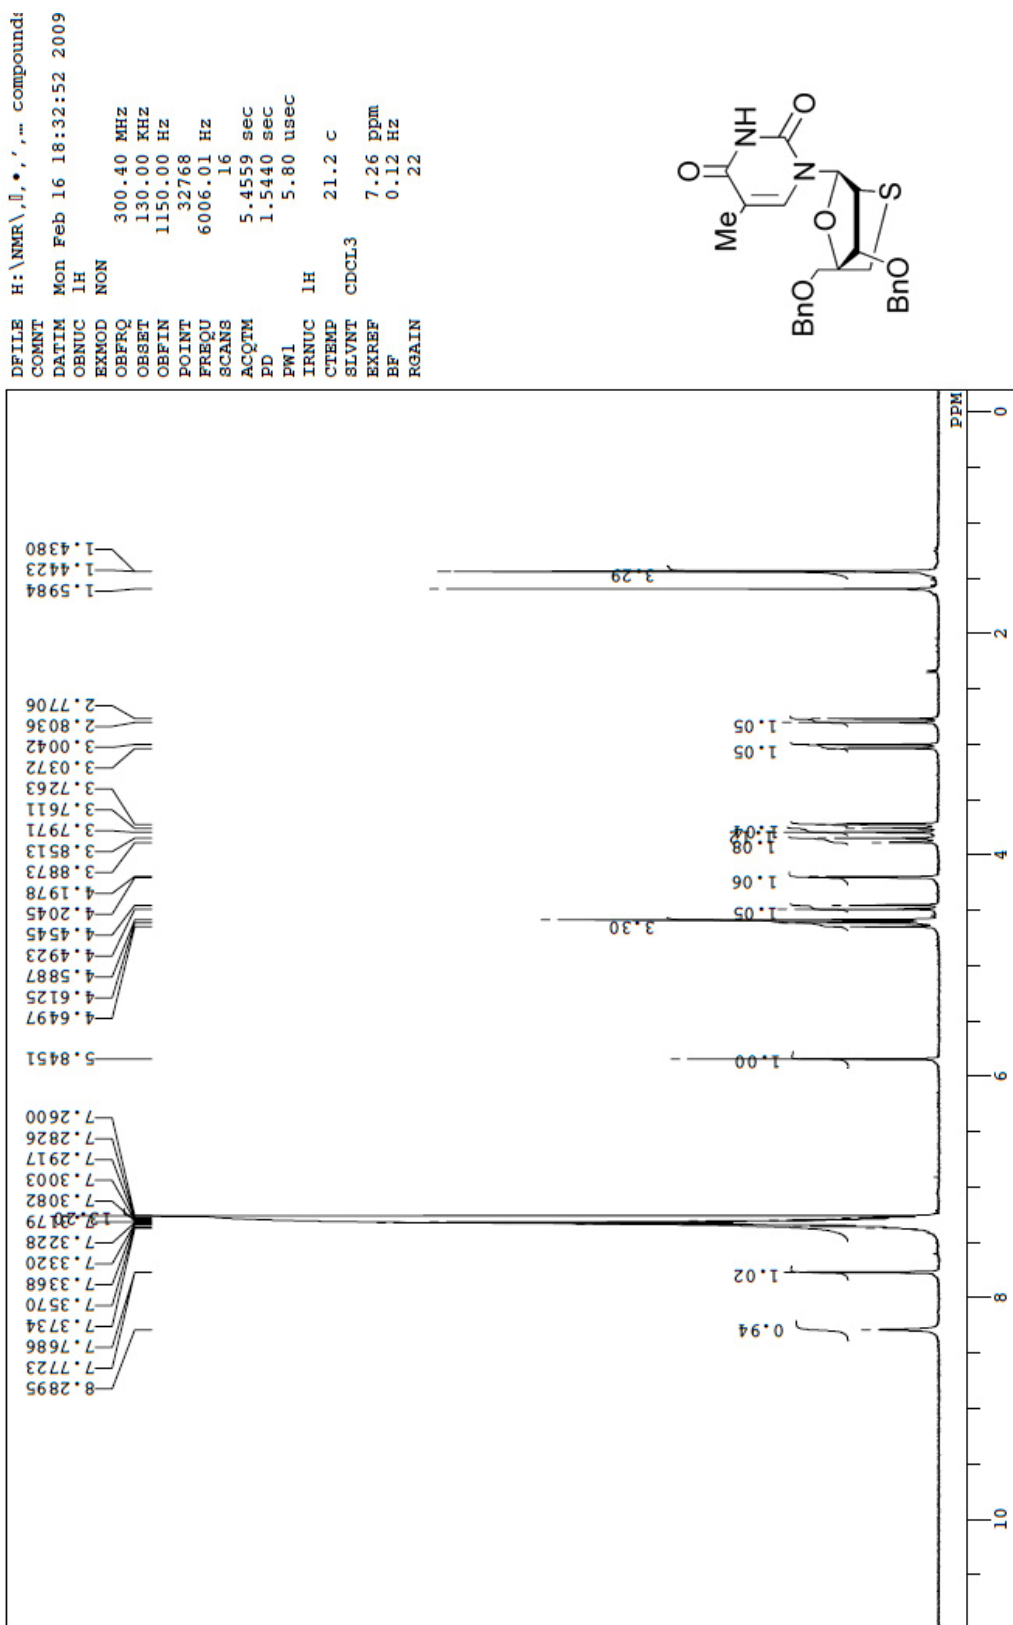

### Compound 3 (<sup>13</sup>C-NMR)

H:\NMR\0,\*,',... compounds  
COMPT Mon Feb 16 20:53:38 2009  
DATIM  
CBNUC 13C  
EXMOD BCM  
OBFRQ 75.45 MHz  
OBSET 124.00 KHz  
OBFIN 1840.00 Hz  
POINT 32768  
FREQU 20356.23 Hz  
SCANS 417  
ACQTM 1.6097 sec  
PD 1.3900 sec  
PW1 4.50 usec  
IRNUC 1H  
CTEMP 21.4 c  
SLVNT CDCL3  
EXREF 77.00 ppm  
EF 0.12 Hz  
RGAIN 24

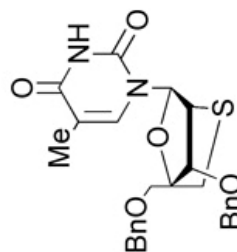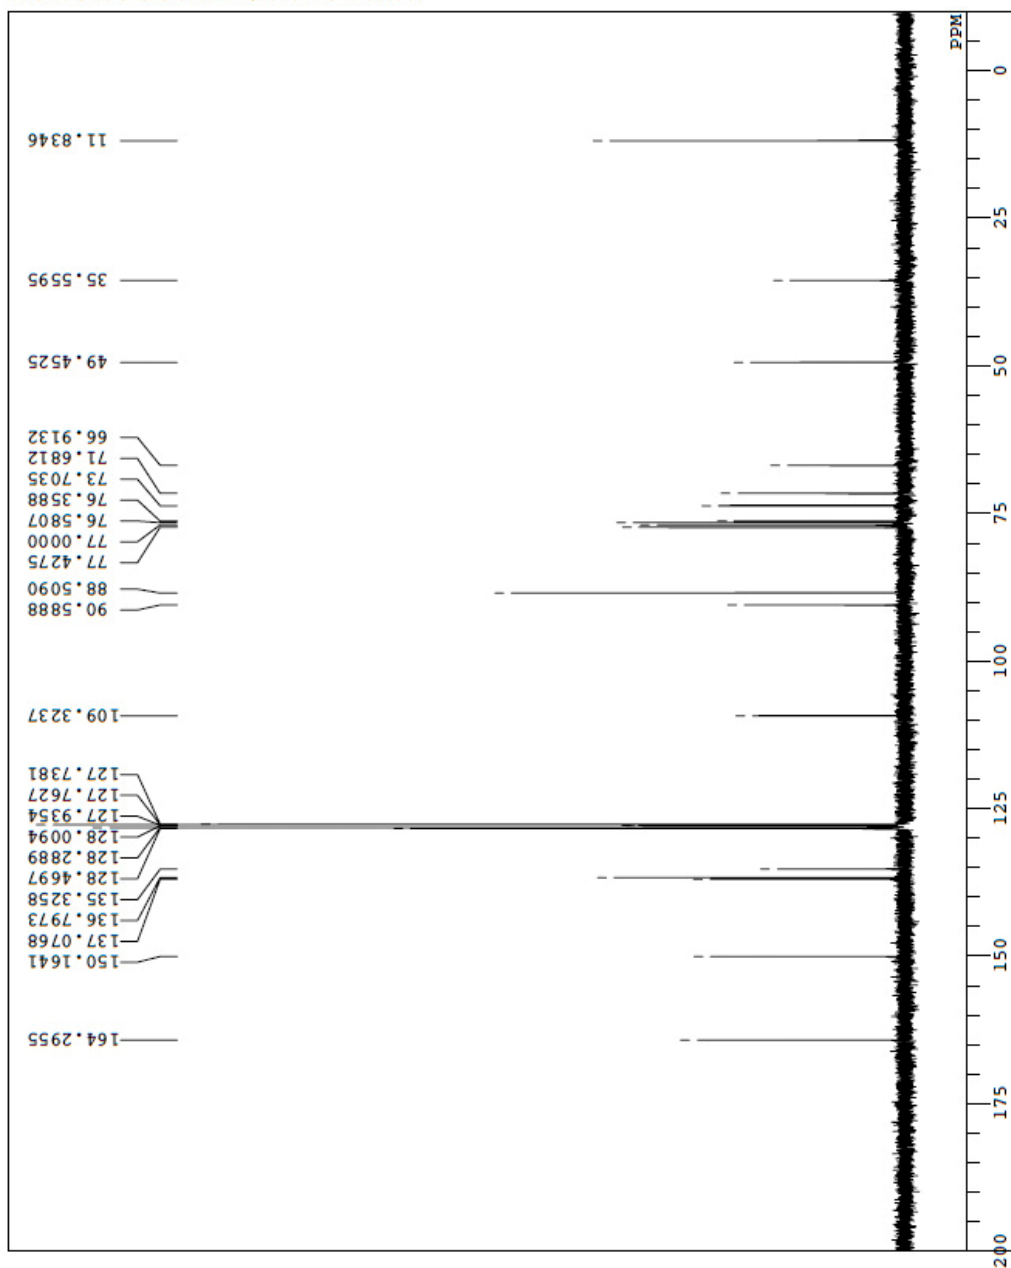

### Compound 4 (<sup>1</sup>H-NMR)

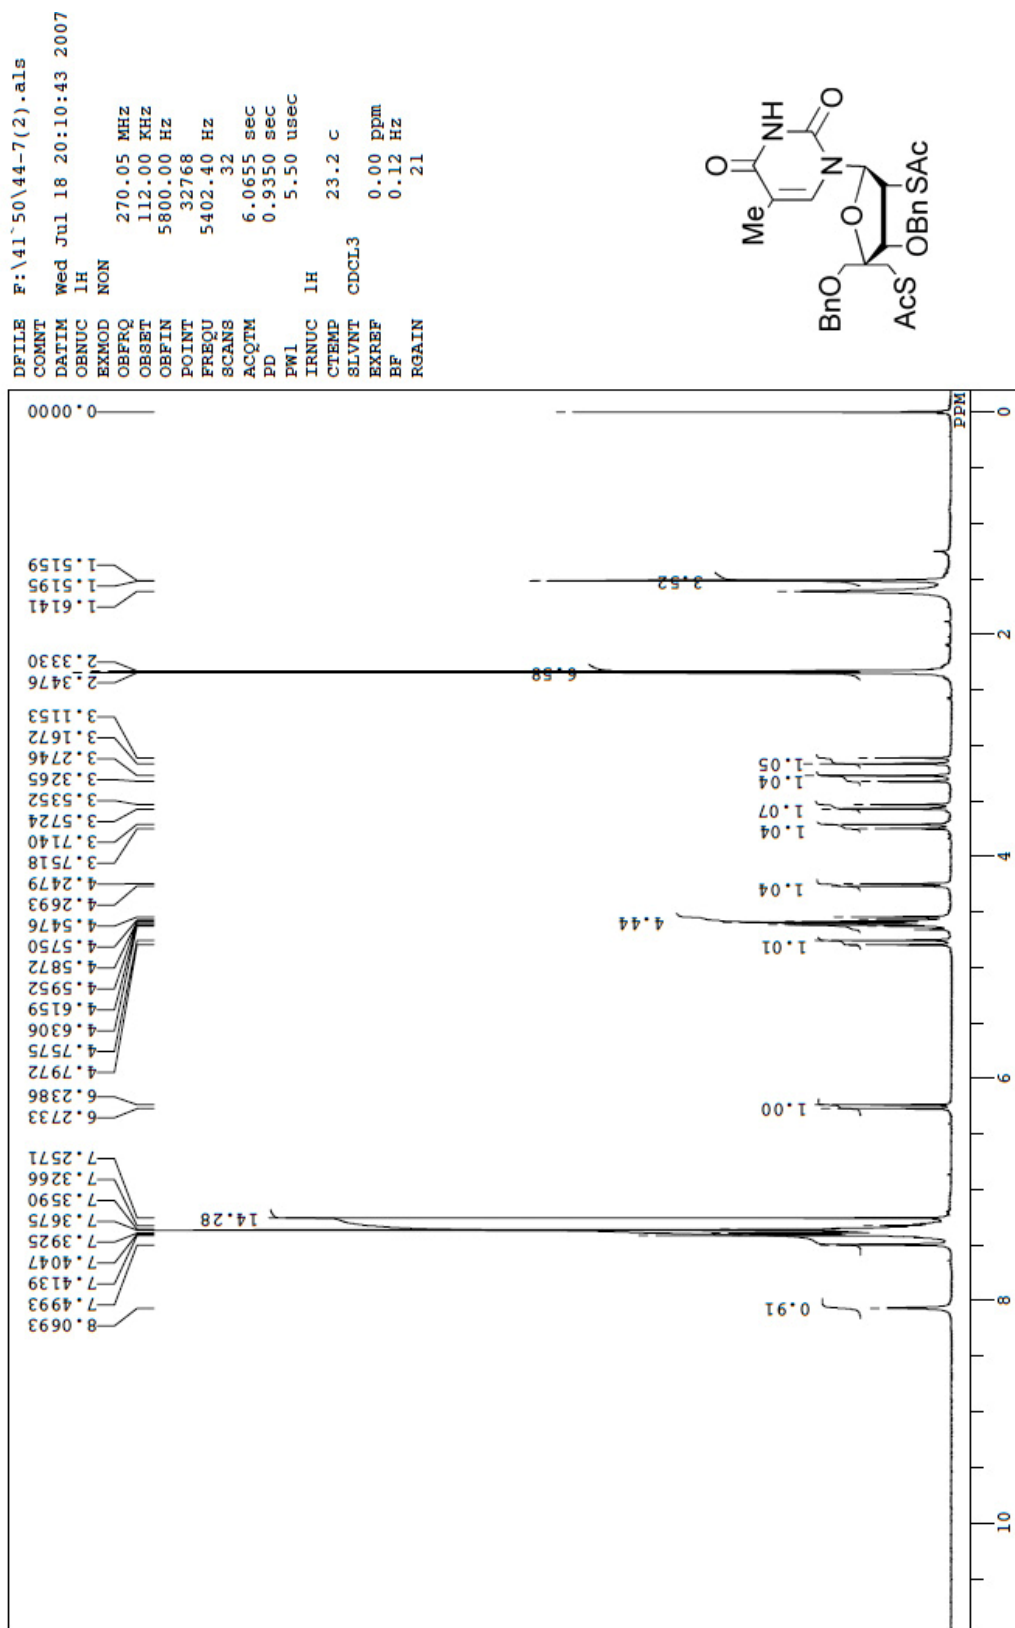

### Compound 4 ( $^{13}\text{C}$ -NMR)

H:\NMR\J,\*,',... Compound:  
COMPT Mon Nov 03 18:23:22 2008  
DATIM 13C  
EXMOD BCM  
OBFRQ 67.80 MHz  
OBSET 135.00 KHz  
OBFIN 5200.00 Hz  
POINT 32768  
FREQU 20000.00 Hz  
SCANS 598  
ACQTM 1.6384 sec  
PD 1.0000 sec  
PW1 4.00 usec  
IRNUC 1H  
CTEMP 21.4 C  
SLVNT CDCL3  
EXREF 77.00 ppm  
BF 1.20 Hz  
RGAIN 26

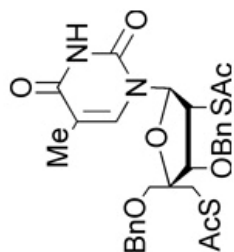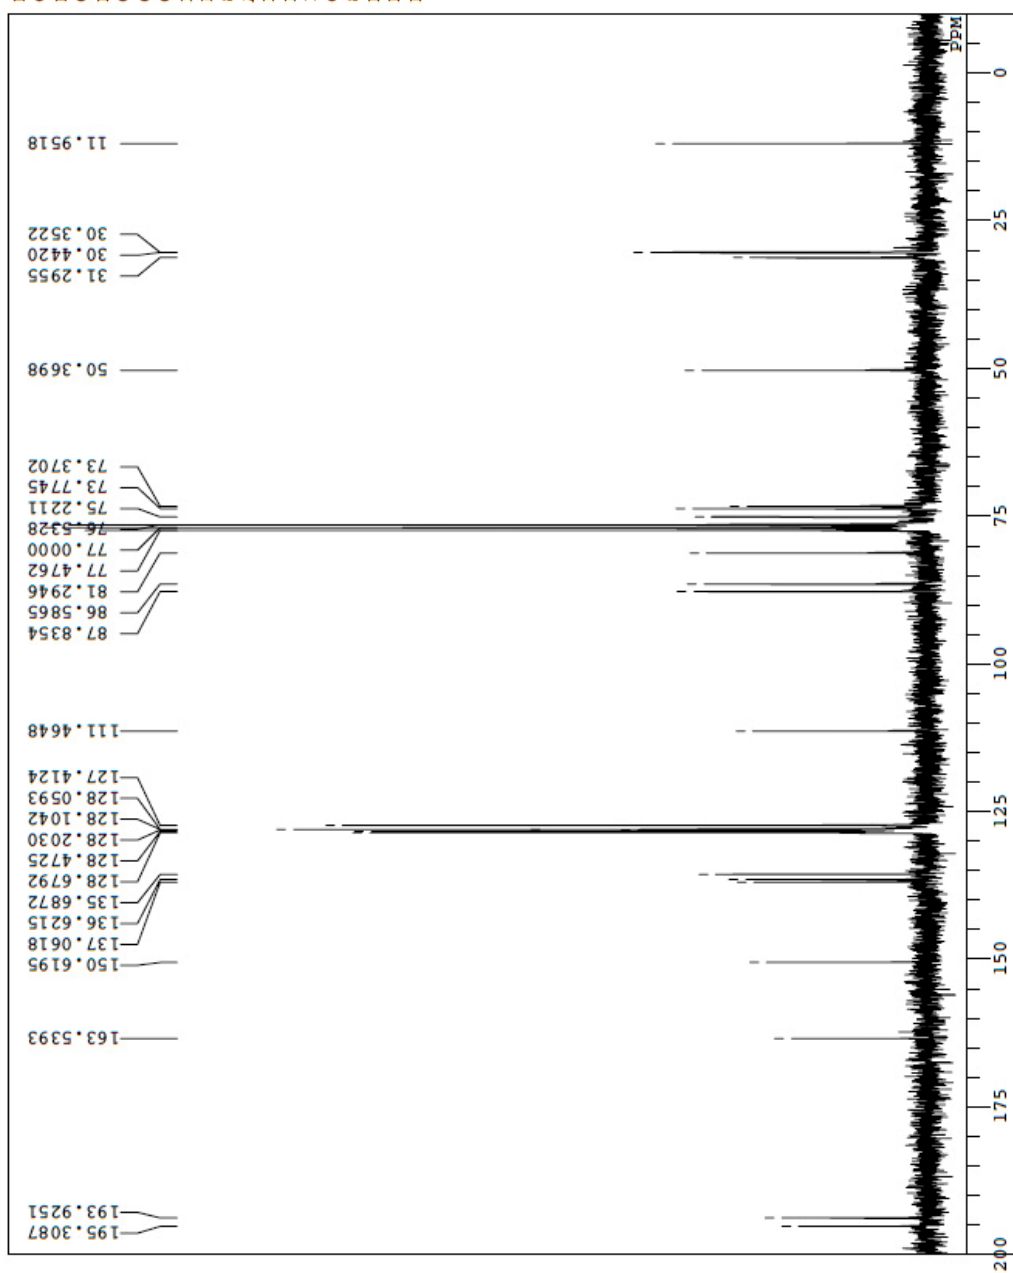

### Compound 7 (<sup>1</sup>H-NMR)

H:\NMR\J.,',',... compound:  
 DF11E  
 COMNT  
 DATIM Fri sep 07 13:54:26 2007  
 OBNUC 1H  
 EXMOD NON  
 OBFRQ 270.05 MHz  
 OBSET 112.00 KHz  
 OBFIN 5800.00 Hz  
 POINT 32768  
 FREQU 5402.40 Hz  
 SCANS 16  
 ACQTM 6.0655 sec  
 PD 0.9350 sec  
 PW1 5.50 usec  
 IRNUC 1H  
 CTEMP 22.2 C  
 SLVNT CDCL3  
 EXREF 0.00 ppm  
 BF 1.20 Hz  
 RGAIN 22

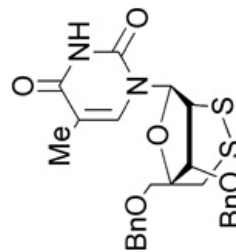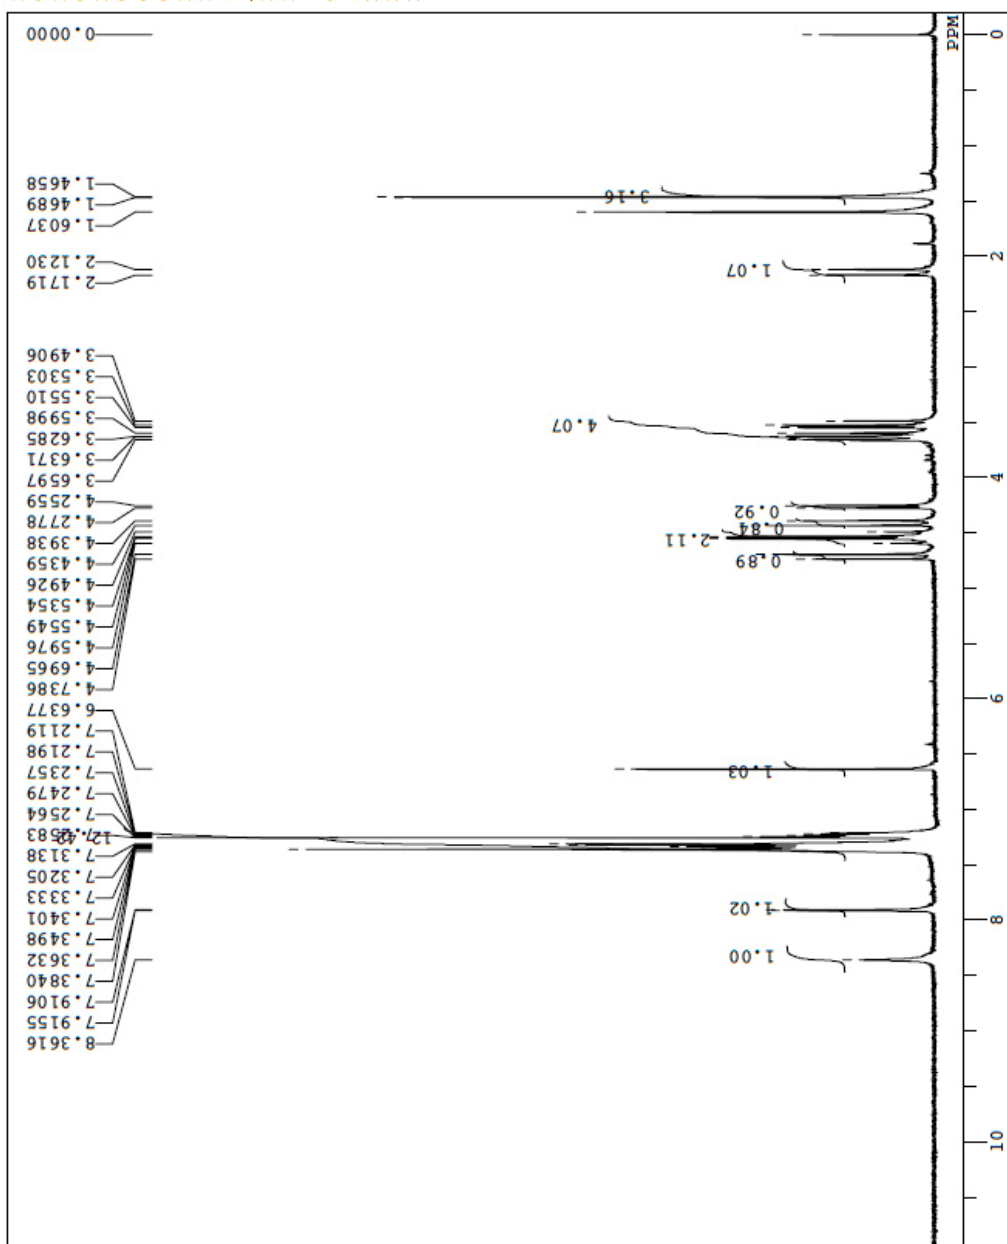

### Compound 7 (<sup>13</sup>C-NMR)

DFILE H:\NMR\J,\*,',... Compound:  
COMPT Tue Sep 11 14:23:19 2007  
DATIM 13C  
EXMOD BCM  
OBFRQ 67.80 MHz  
OBNUC 135.00 KHz  
OBSET 5200.00 Hz  
OBFIN 32768  
POINT 18315.00 Hz  
SCANS 922  
ACQTM 1.7891 sec  
PD 1.2110 sec  
PW1 4.00 usec  
IRNUC 1H  
CTEMP 22.3 C  
SLVNT CDCL3  
EXREF 77.00 ppm  
BF 0.12 Hz  
RGAIN 26

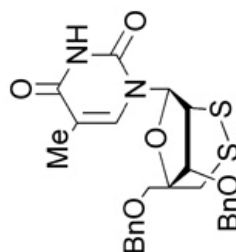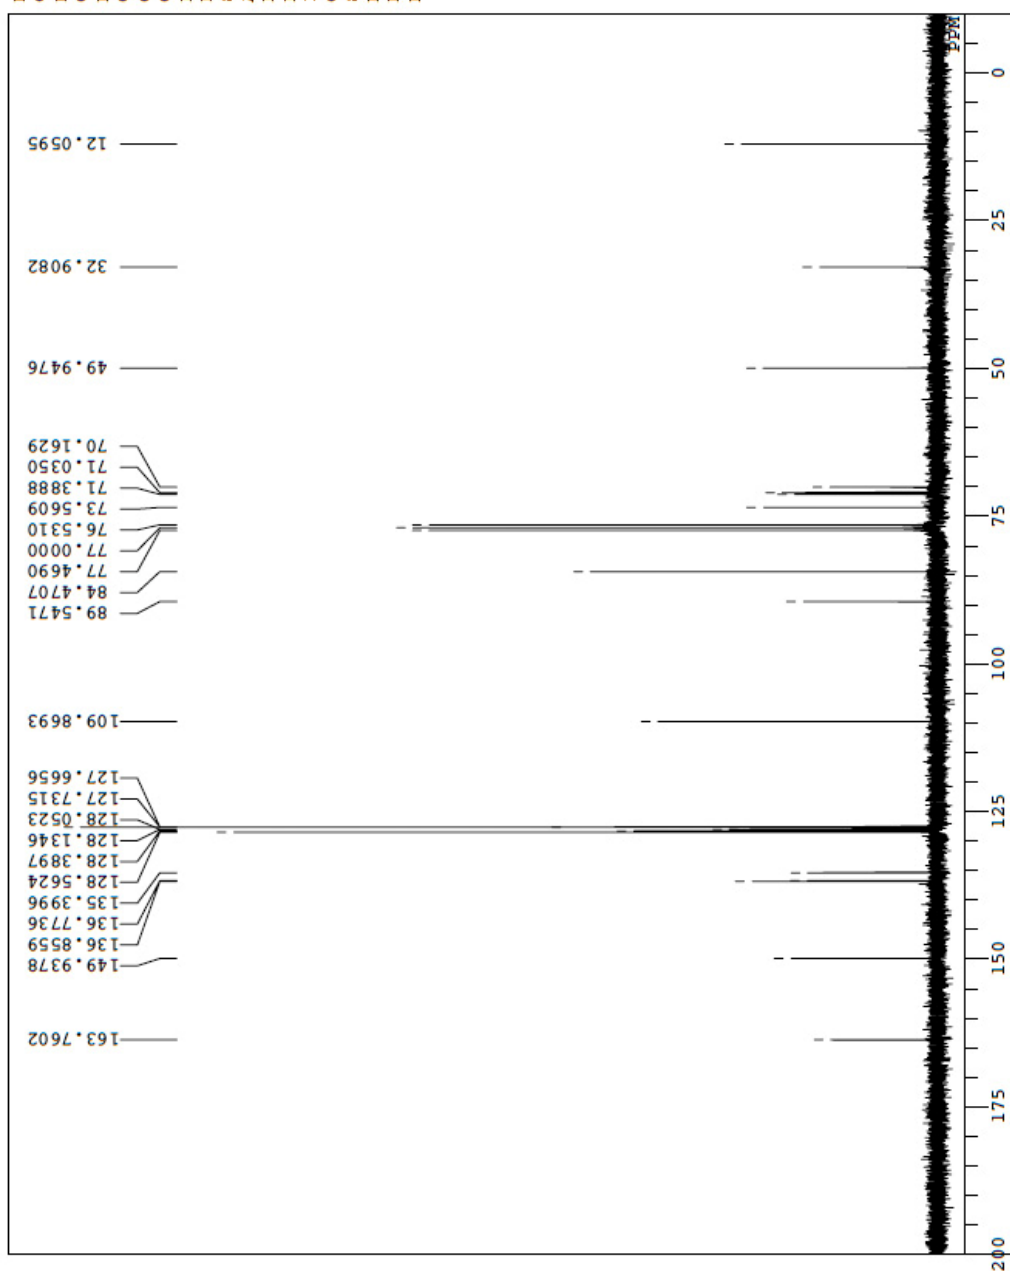

### Compound 8 (<sup>1</sup>H-NMR)

D:\NMR\0,\*,',... compounds  
COMPT  
DATIM Fri Nov 07 14:20:50 2008  
OBNUC 1H  
EXMOD NON  
OBFFQ 300.40 MHz  
OBSET 130.00 KHz  
OBFIN 1150.00 Hz  
POINT 32768  
FREQU 6006.01 Hz  
SCANS 19  
ACQTM 5.4559 sec  
PD 1.5440 sec  
PW1 5.80 usec  
IRNUC 1H  
CTEMP 19.3 C  
SLVNT CD3OD  
EXREF 3.31 ppm  
BF 0.12 Hz  
RGAIN 17

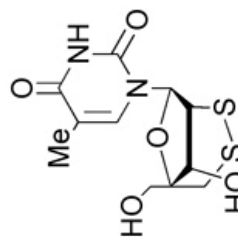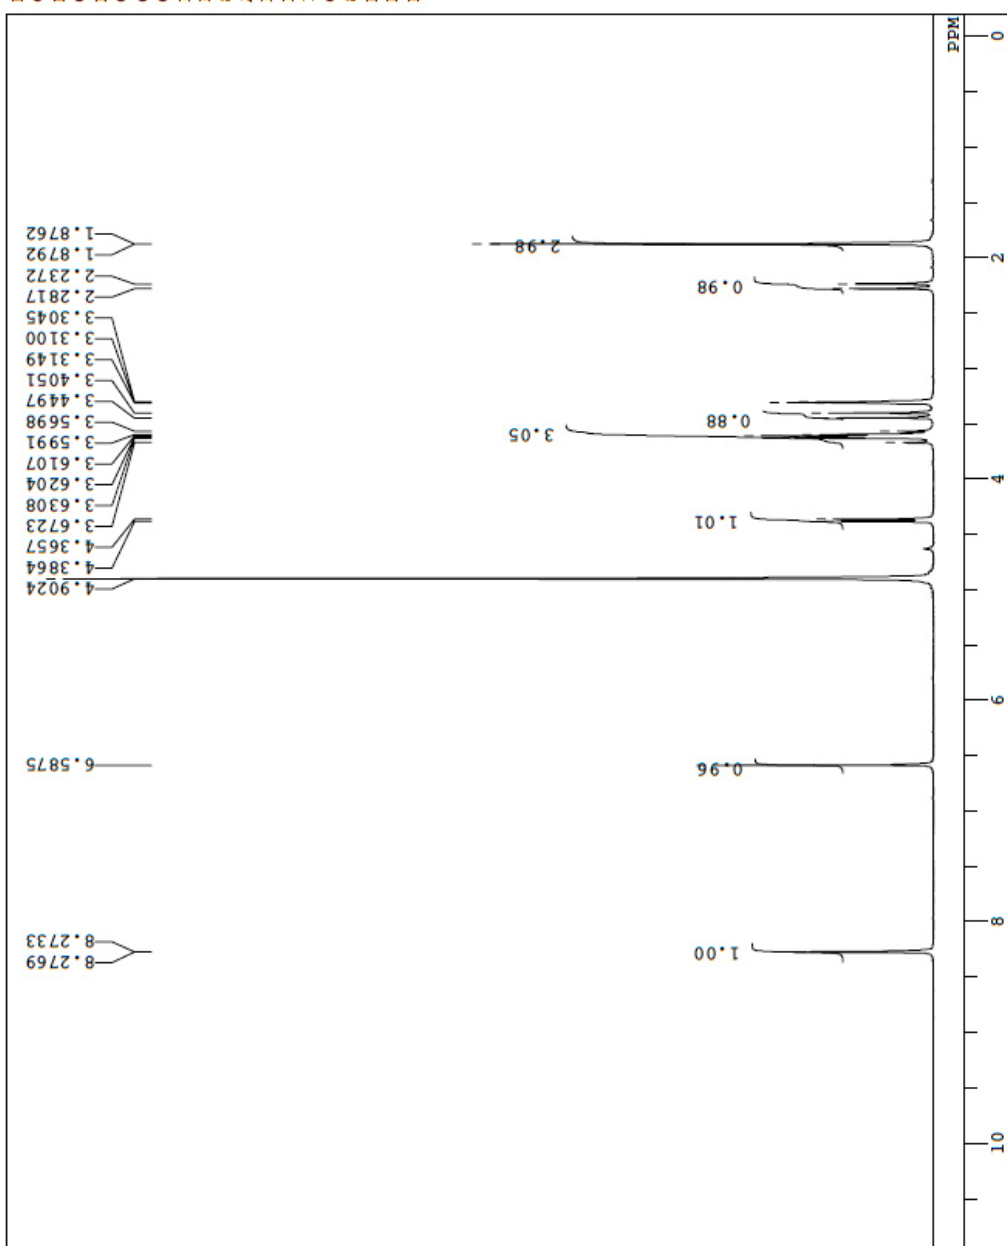

### Compound **8** ( $^{13}\text{C}$ -NMR)

H:\NMR\1,\*,',... compound:  
DFILE COMNT  
DATIM Thu Nov 06 14:13:17 2008  
CENUC 13C  
EXMOD BCM  
CBEFRQ 67.80 MHz  
CBESET 135.00 KHz  
CBEFIN 5200.00 Hz  
POINT 32768  
FREQU 20000.00 Hz  
SCANS 501  
ACQTM 1.6384 sec  
PD 1.0000 sec  
PWL 4.00 usec  
IRNUC 1H  
CTEMP 20.8 C  
SOLVT CD3OD  
EXREF 49.00 ppm  
BF 1.20 Hz  
RGAIN 26

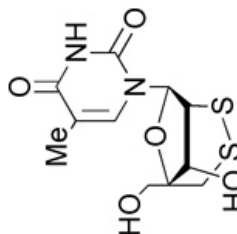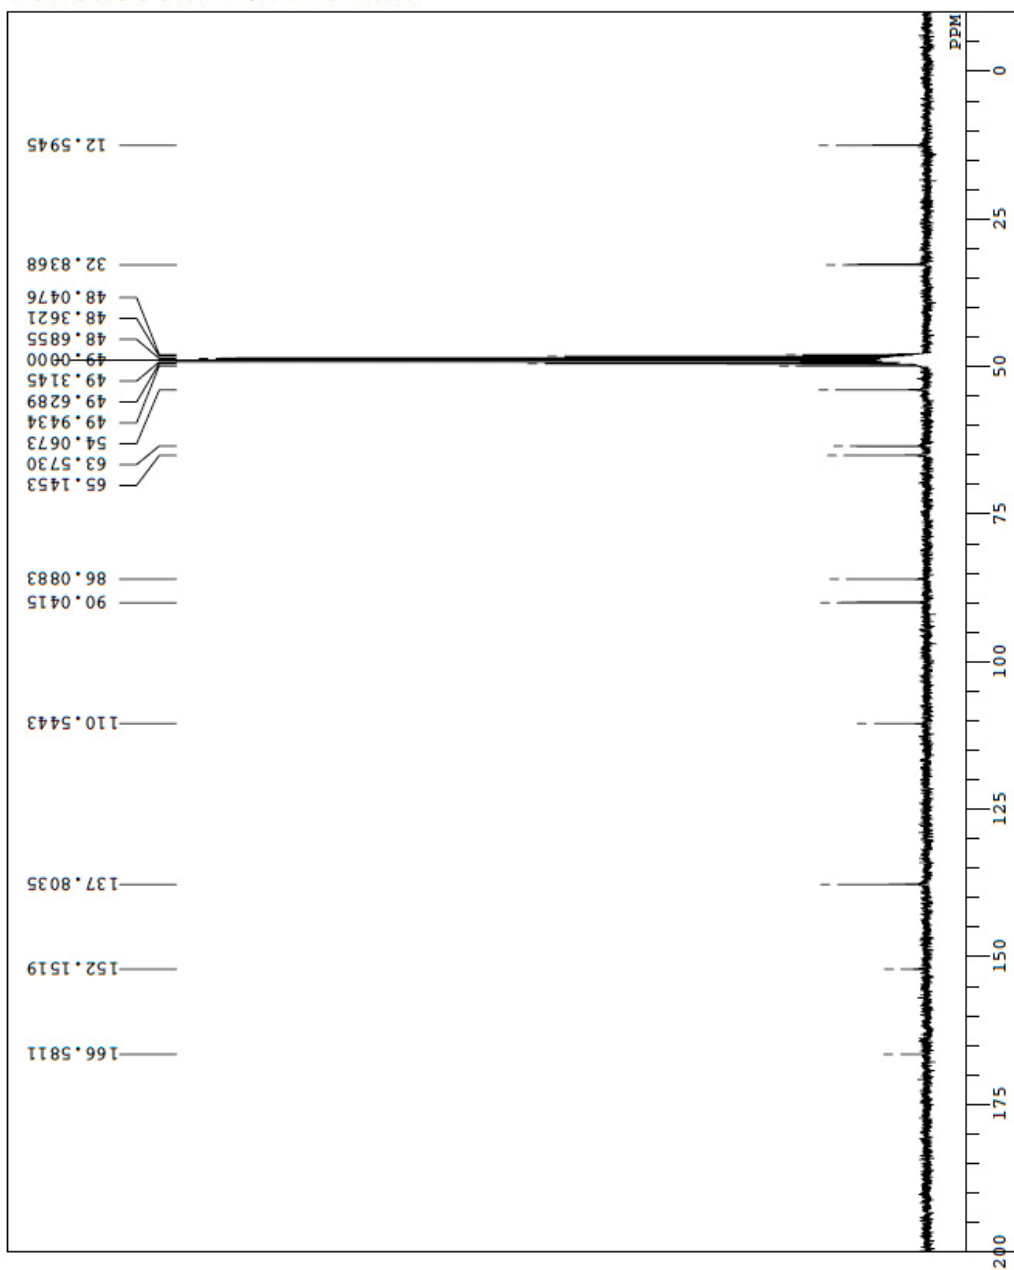



#### 4. Reactions of monomer **8** using reducing and oxidating reagents

##### 4-A (reductant: DTT, oxidant: H<sub>2</sub>O<sub>2</sub>)

To the solution of compound **8** (2.0 mg, 6.3 μmol) in CD<sub>3</sub>OD/deuterated PBS buffer =9/1 (0.6 mL) was added 0.32 M dithiothreitol solution 20 μL in CD<sub>3</sub>OD/deuterated PBS buffer =9/1 (6.3 μmol) and the reaction mixture was kept static in a NMR tube for 1 h. After confirming the progress of the reaction by <sup>1</sup>H-NMR spectroscopy, 0.21% H<sub>2</sub>O<sub>2</sub> 20 μL in CD<sub>3</sub>OD/deuterated PBS buffer =9/1 (6.3 μmol) was added to the reaction mixture and the mixture was kept static in a NMR tube for 1 h. The progress of the reaction was also confirmed.

##### 4-B (reductant: NaBH<sub>4</sub>, oxidant: H<sub>2</sub>O<sub>2</sub>)

To the solution of compound **8** (2.0 mg, 6.3 μmol) in CD<sub>3</sub>OD/deuterated PBS buffer =9/1 (0.6 mL) was added 0.63 M NaBH<sub>4</sub> solution 10 μL in CD<sub>3</sub>OD/deuterated PBS buffer (pH 7.4) = 9/1 (6.3 μmol) and the reaction mixture was kept static in a NMR tube for 1 h. After confirming the progress of the reaction by <sup>1</sup>H-NMR spectroscopy, 0.42% H<sub>2</sub>O<sub>2</sub> 40 μL in CD<sub>3</sub>OD/deuterated PBS buffer =9/1 (25.2 μmol) was added to the reaction mixture and the mixture was kept static in a NMR tube for 1 h. The progress of the reaction was also confirmed.

##### 4-C (reductant: TCEP, oxidant: H<sub>2</sub>O<sub>2</sub>)

To the solution of compound **8** (2.0 mg, 6.3 μmol) in CD<sub>3</sub>OD/deuterated PBS buffer (pH 7.4) = 9/1 (0.6 mL) was added tris(2-carboxyethyl)phosphine hydrochloride (1.8 mg, 6.3 μmol) and the reaction mixture was kept static in a NMR tube for 1 h. After confirming the progress of the reaction by <sup>1</sup>H-NMR spectroscopy, 0.42% H<sub>2</sub>O<sub>2</sub> 10 μL in CD<sub>3</sub>OD/deuterated PBS buffer =9/1 (6.3 μmol) was added to the reaction mixture and the mixture was kept static in a NMR tube for 12 h. The progress of the reaction was also confirmed.

**4-D** (reductant: DTT, oxidant: I<sub>2</sub>)

To the solution of compound **8** (2.0 mg, 6.3 μmol) in CD<sub>3</sub>OD/deuterated PBS buffer (pH 7.4) = 9/1 (0.6 mL) was added 0.63 M dithiothreitol solution 10 μL in CD<sub>3</sub>OD/deuterated PBS buffer =9/1 (6.3 μmol) and the reaction mixture was kept static in a NMR tube for 1 h. After confirming the progress of the reaction by <sup>1</sup>H-NMR spectroscopy, 0.63 M iodine solution 10 μL in CD<sub>3</sub>OD/deuterated PBS buffer (pH 7.4) = 9/1 (6.3 μmol) was added to the reaction mixture and the mixture was kept static in a NMR tube for 1 h. The progress of the reaction was also confirmed.

**4-E** (reductant: DTT, oxidant: DTDP)

To the solution of compound **8** (2.0 mg, 6.3 μmol) in CD<sub>3</sub>OD/deuterated PBS buffer (pH 7.4) = 9/1 (0.6 mL) was added 0.63 M dithiothreitol solution 10 μL in CD<sub>3</sub>OD/deuterated PBS buffer (pH 7.4) = 9/1 (6.3 μmol) and the reaction mixture was kept static in a NMR tube for 1 h. After confirming the progress of the reaction by <sup>1</sup>H-NMR spectroscopy, 2,2'-dithiodipyridine (1.4 mg, 6.3 μmol) was added to the reaction mixture and the mixture was kept static in a NMR tube for 1 h. The progress of the reaction was also confirmed.

**4-F** (reductant: 2-mercaptoethanol, oxidant: H<sub>2</sub>O<sub>2</sub>)

To the solution of compound **8** (2.0 mg, 6.3 μmol) in CD<sub>3</sub>OD/deuterated PBS buffer (pH 7.4) = 9/1 (0.6 mL) was added 2-mercaptoethanol (4.4 μL, 63 μmol) and the reaction mixture was kept static in a NMR tube for 12 h. After confirming the progress of the reaction by <sup>1</sup>H-NMR spectroscopy, 0.84% H<sub>2</sub>O<sub>2</sub> 25 μL in CD<sub>3</sub>OD/deuterated PBS buffer =9/1 (31.5 μmol) was added to the reaction mixture and the mixture was kept static in a NMR tube for xx h. The progress of the reaction was also confirmed.

4-A

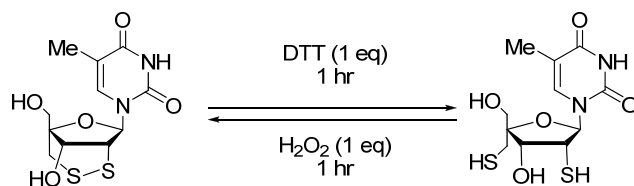

1 hr after addition of dithiothreitol (DTT)

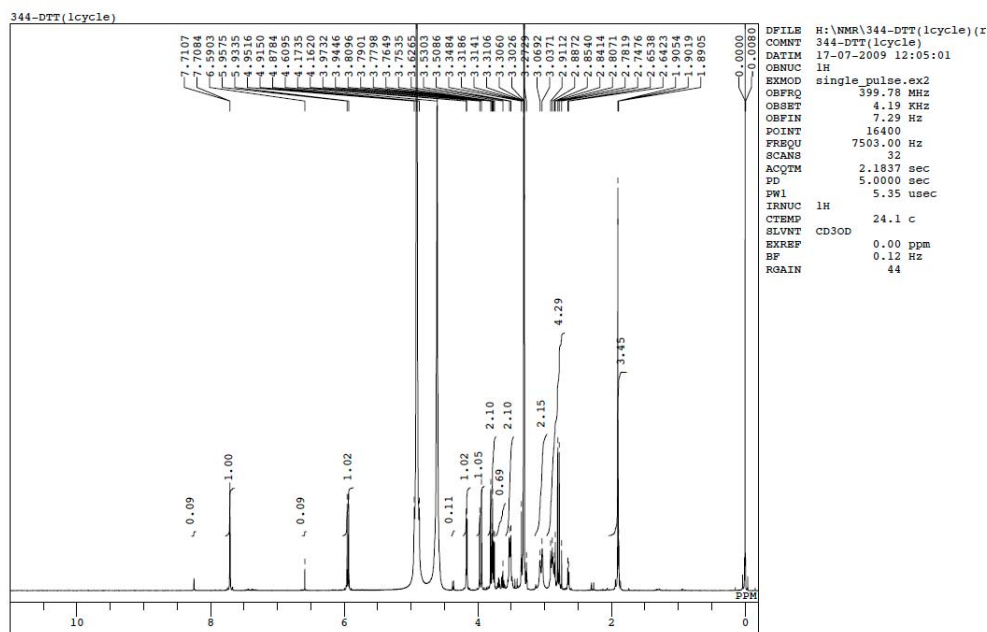

1 hr after addition of H<sub>2</sub>O<sub>2</sub>

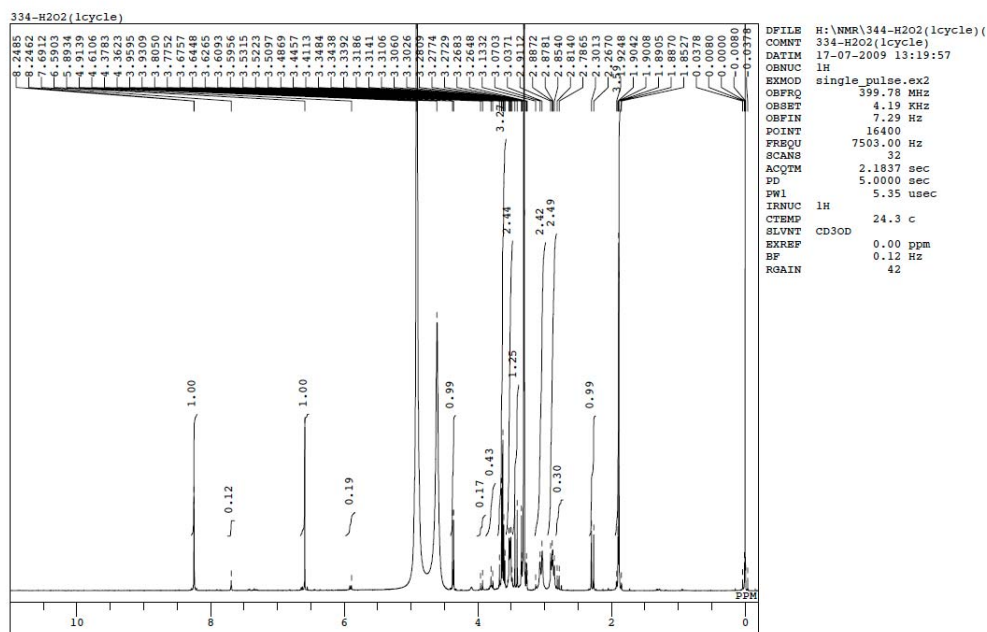

4-B

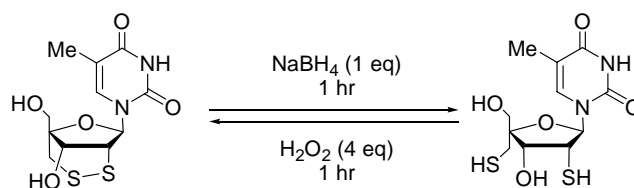

1 hr after addition of NaBH<sub>4</sub>

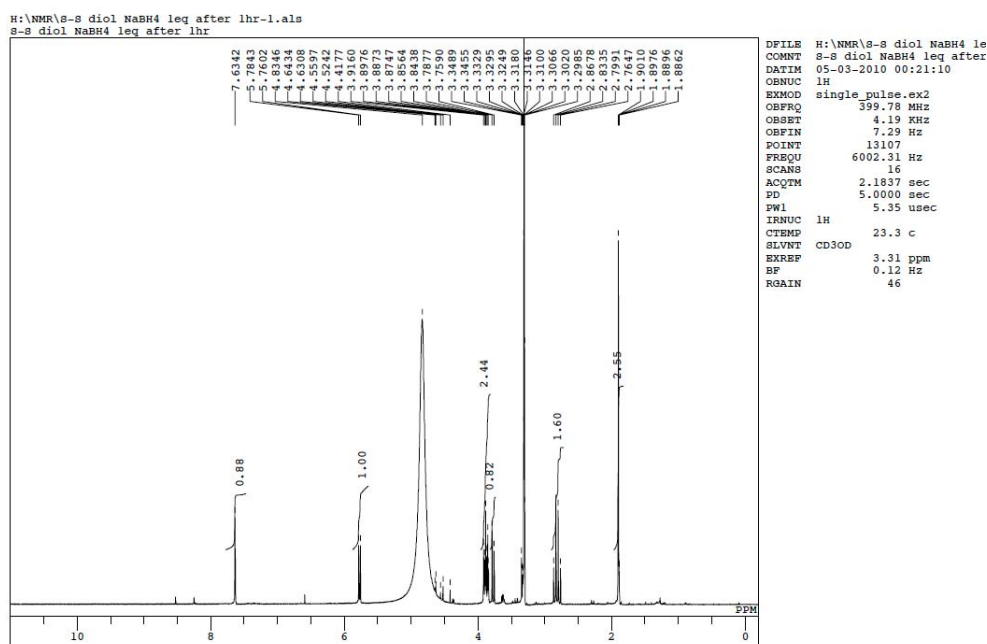

1 hr after addition of H<sub>2</sub>O<sub>2</sub>

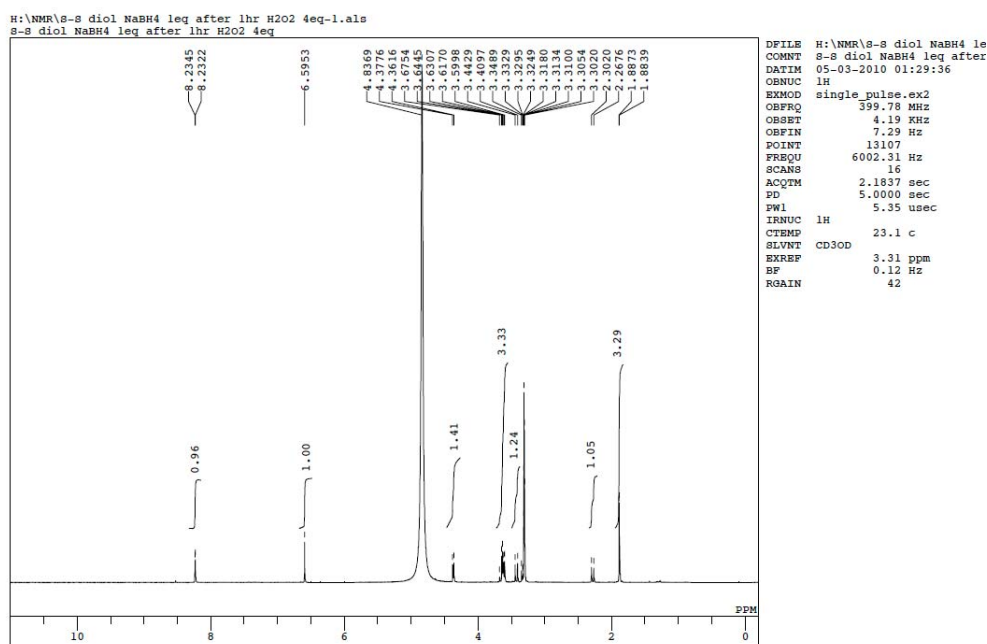

4-C

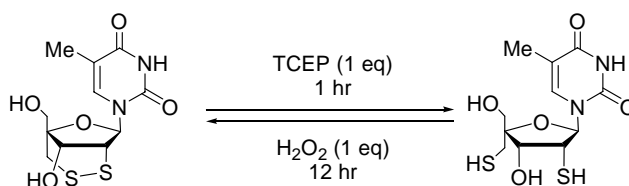

1 hr after addition of tris(2-carboxyethyl)phosphine hydrochloride (TCEP)

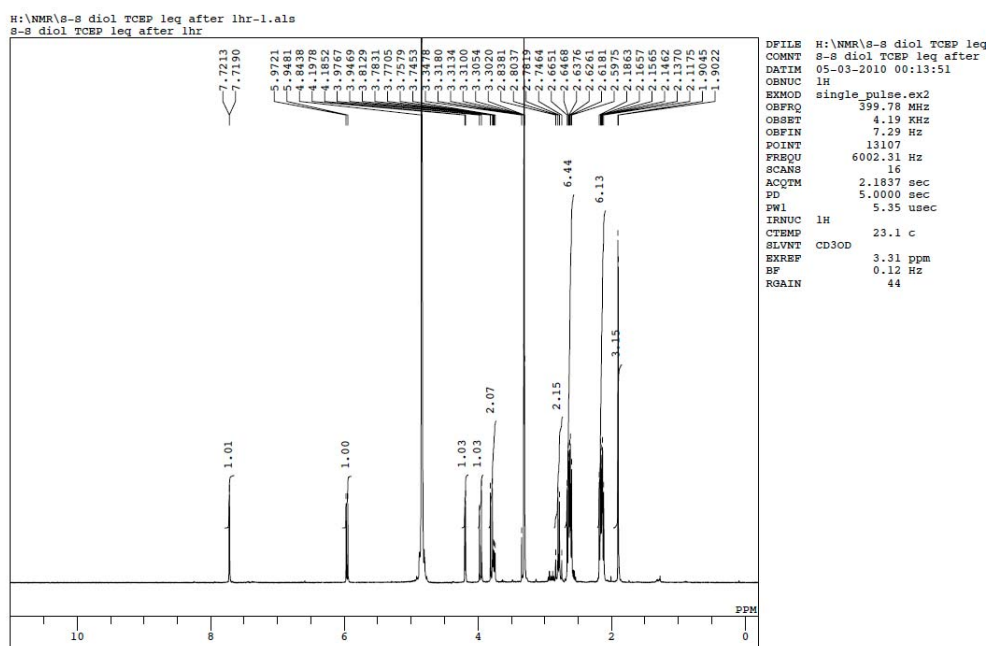

12 hr after addition of H<sub>2</sub>O<sub>2</sub>

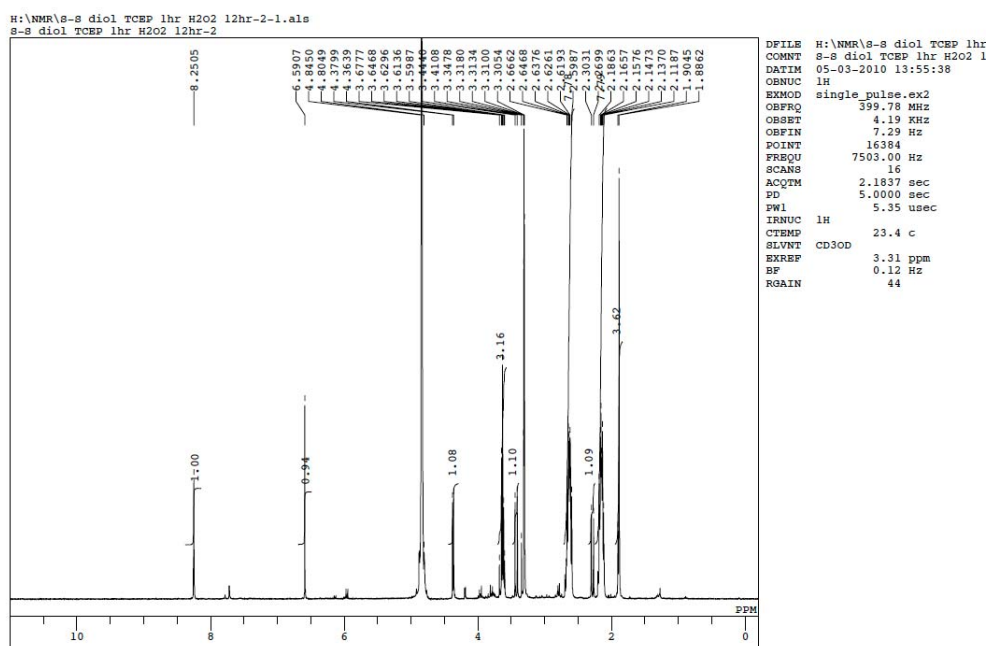

4-D

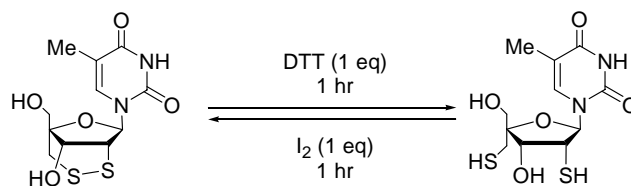

1 hr after addition of dithiothreitol (DTT)

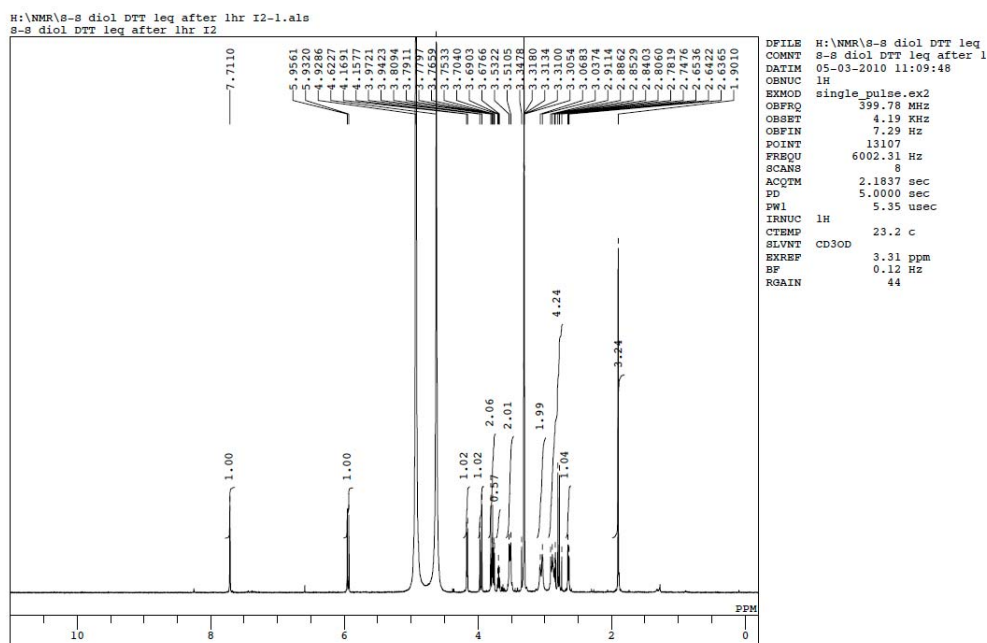

1 hr after addition of I<sub>2</sub>

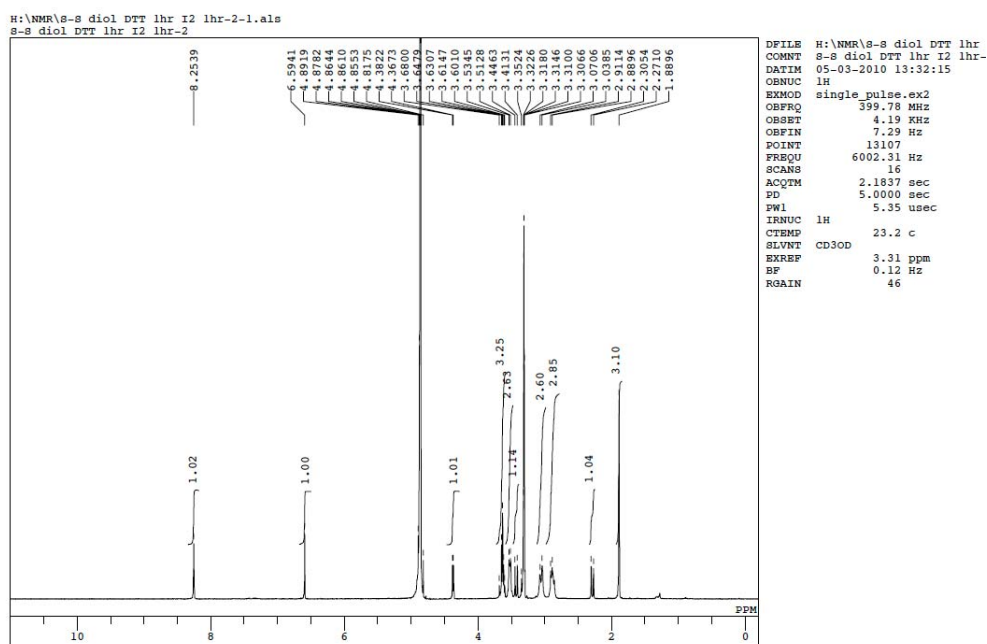

4-E

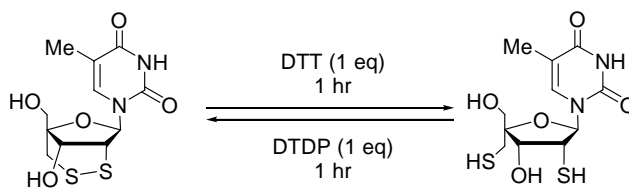

1 hr after addition of dithiothreitol (DTT)

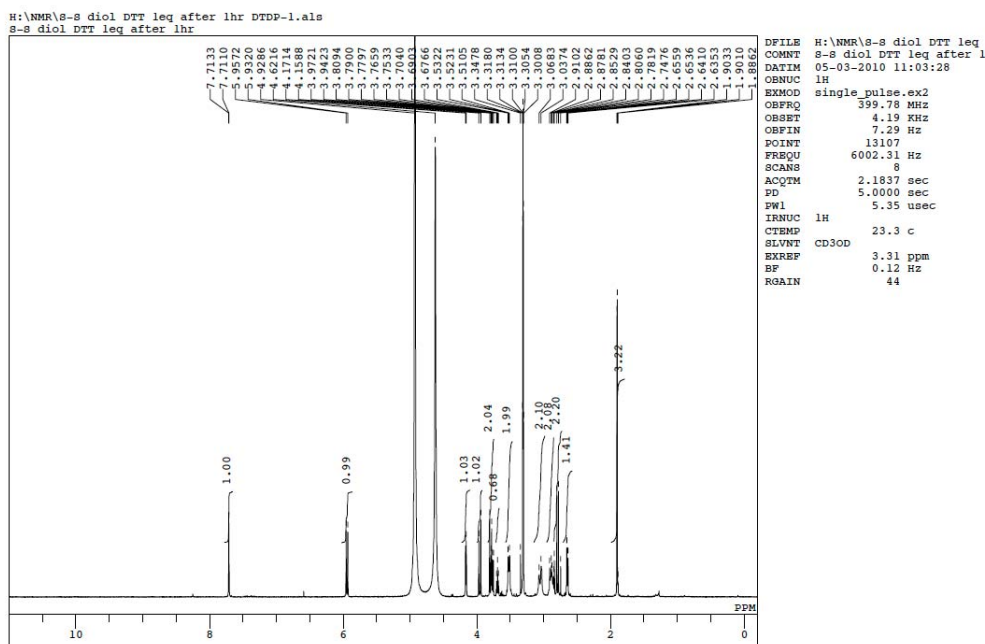

1 hr after addition of 2,2'-dithiodipyridine (DTDP)

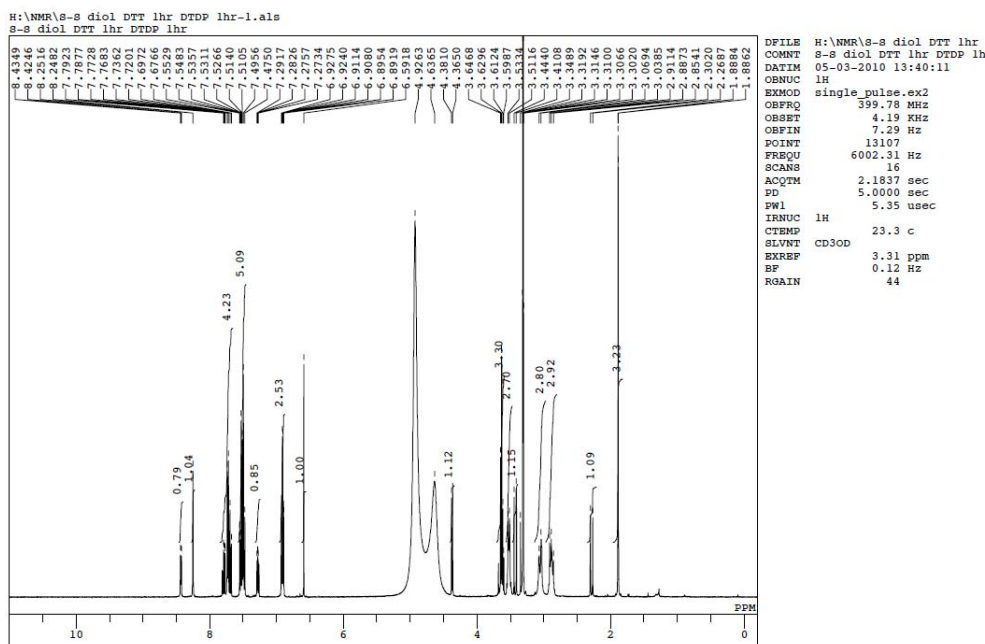

4-F

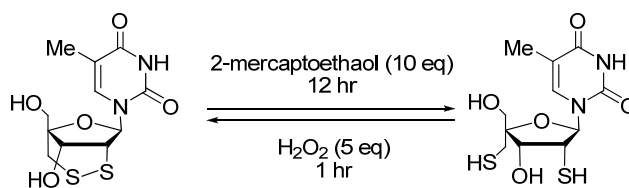

12 hr after addition of 2-mercaptoethanol

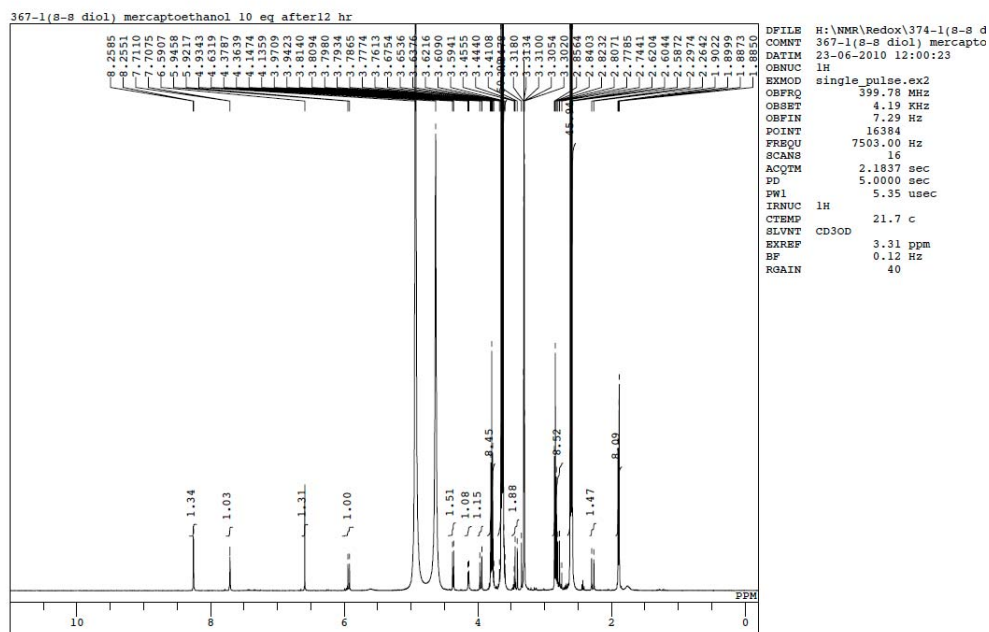

1 hr after addition of H<sub>2</sub>O<sub>2</sub>

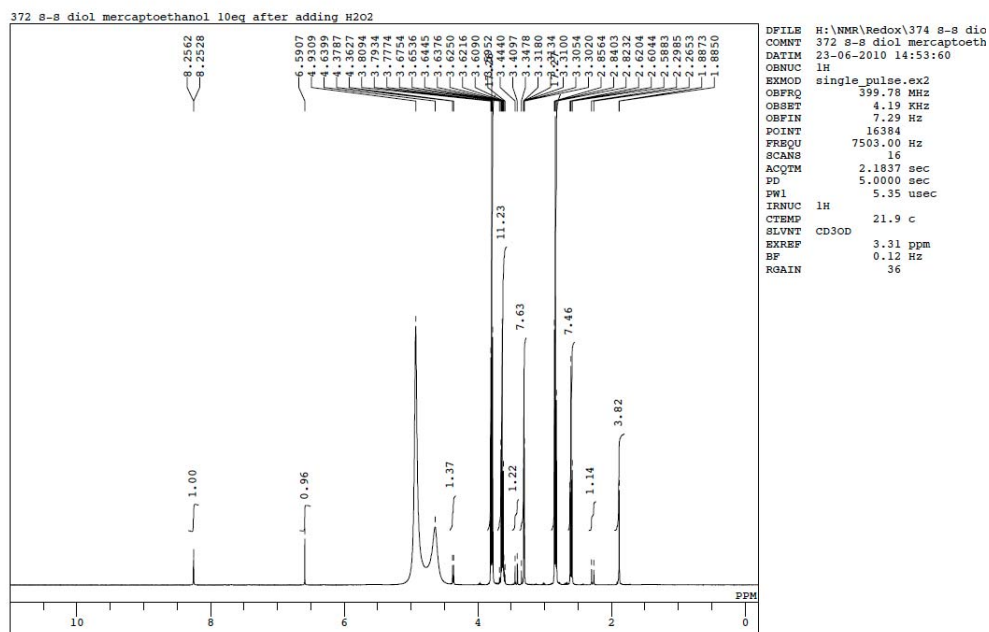



## 5. Mass spectrum of BNA monomer **8**, **9** and **8-D**, **9-D**

### Methods

All ESI-Mass spectra were measured using Thermo LCQ Deca XP MAX and positive mode was used. All samples were diluted to 100  $\mu$ M.

### **8**

Compound **8** (3.2 mg, 10  $\mu$ mol) was dissolved in methanol (1.0 mL) and the solution was diluted by 100 times using 0.1% trifluoroacetic acid in H<sub>2</sub>O/MeCN (10/1) solution.

### **9**

To a solution of compound **8** (3.2 mg, 10  $\mu$ mol) in methanol (1.0 mL) was added dithiothreitol (15.4 mg, 100  $\mu$ mol) and the reaction mixture was kept standing in an eppendorf tube for an hour. The reaction mixture was diluted by 100 times using 0.1% trifluoroacetic acid in H<sub>2</sub>O/MeOH (10/1) solution.

### **8-D**

After coevaporation of **8** with deuterated methanol for 2 times, **8** (3.2 mg, 10  $\mu$ mol) was dissolved in deuterated methanol (1.0 mL) and the solution was diluted by 100 times using 0.1% trifluoroacetic acid in D<sub>2</sub>O solution.

### **9-D**

After coevaporation of **8** with deuterated methanol for 2 times, to a solution of **8** (3.2 mg, 10  $\mu$ mol) in deuterated methanol (1.0 mL) was added dithiothreitol (7.7 mg, 50  $\mu$ mol) and the reaction mixture was kept standing in an eppendorf tube for an hour. The reaction mixture was diluted by 100 times using 0.1% trifluoroacetic acid in D<sub>2</sub>O solution.

8

S-S diol 0.1 % TFA in H2O-MeCN 10-1 e...

07/01/2010 02:09:24 PM

S-S diol 0.1 % TFA in H2O eppen positiv

10uL/min

S-S diol 0.1 % TFA in H2O-MeCN 10-1 eppen positive #39-64 RT: 1.02-1.68 AV: 26 NL: 5.68E6

T: + p ESI ms [ 150.00-2000.00]

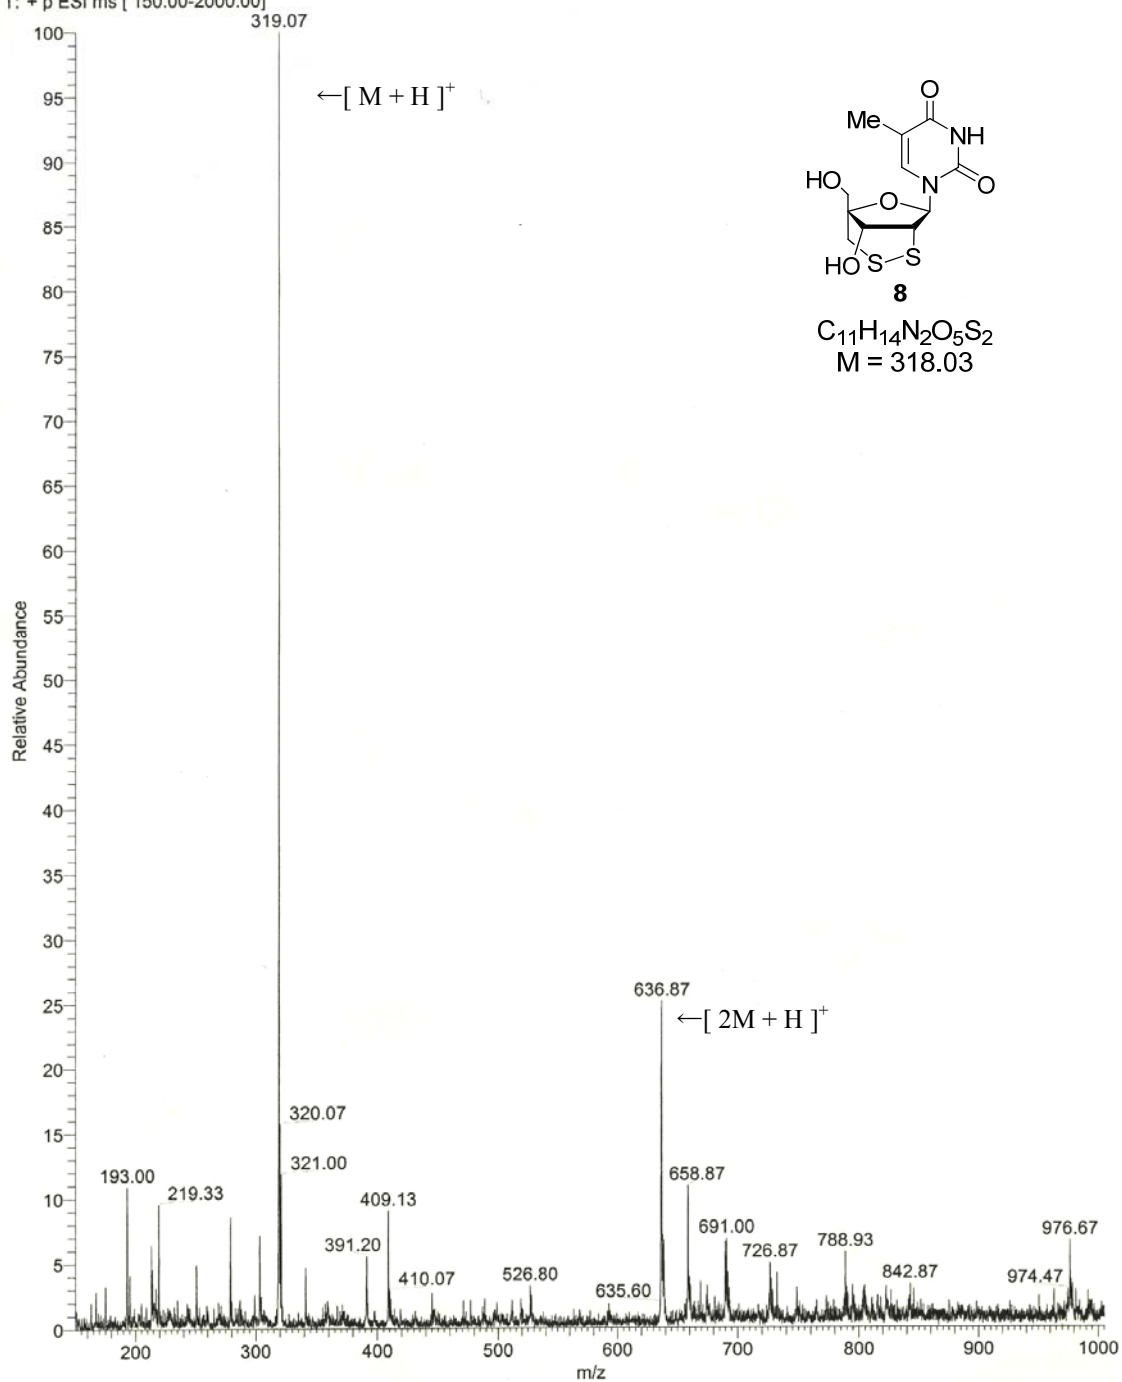

9

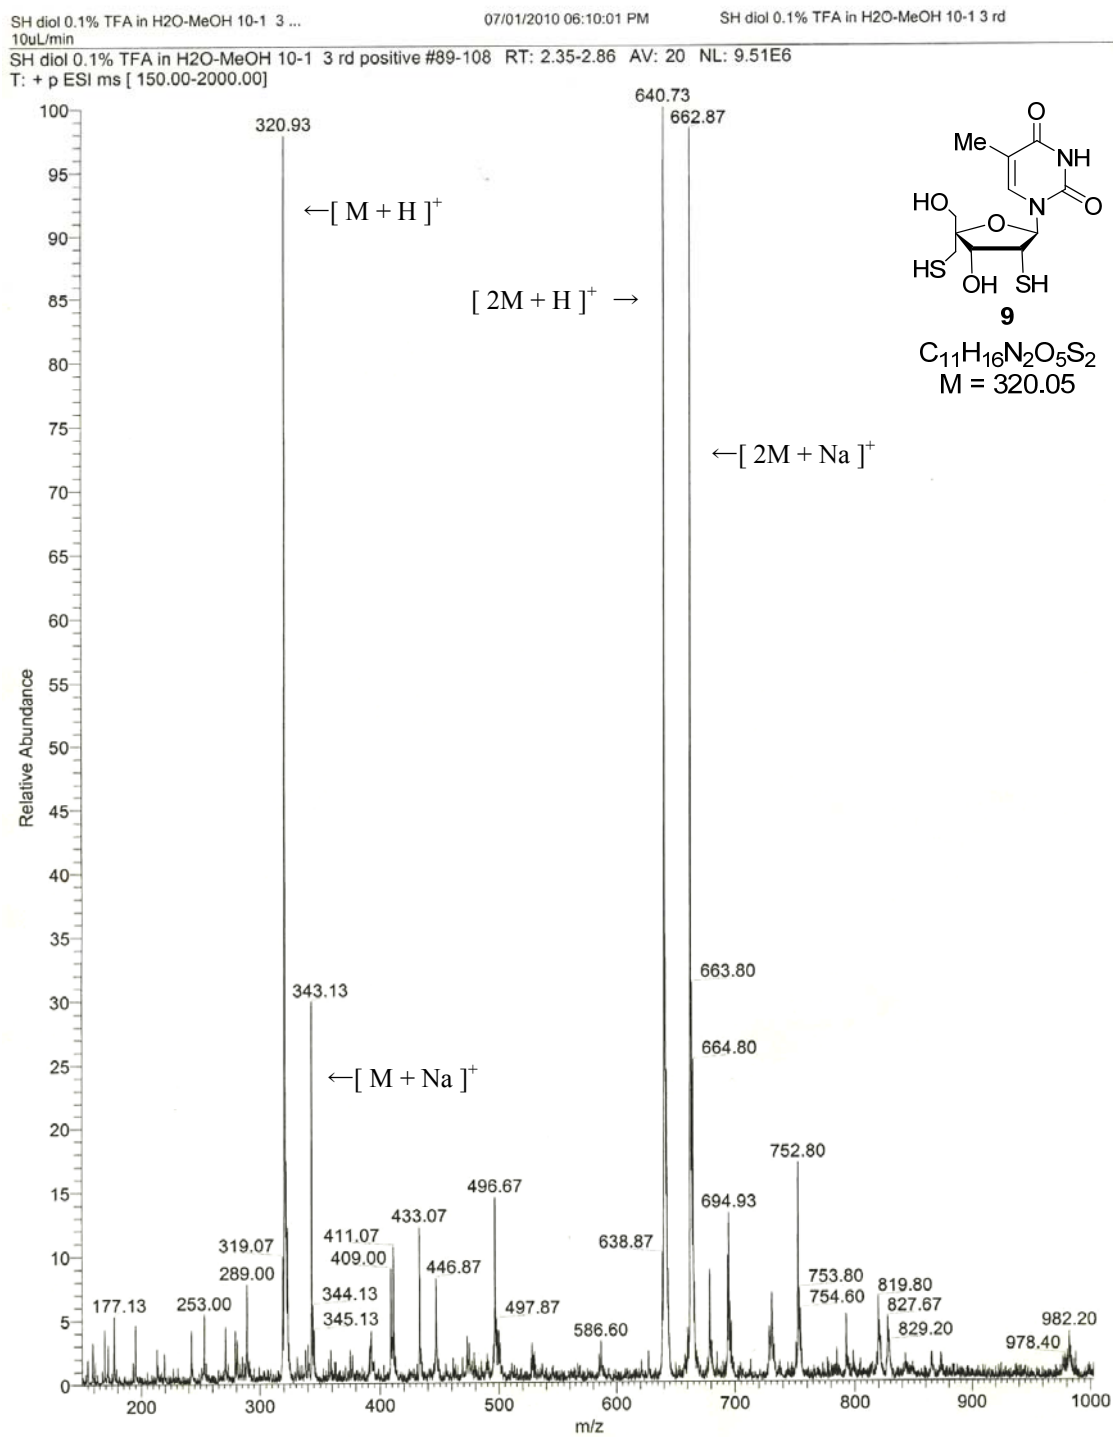

## 8-D

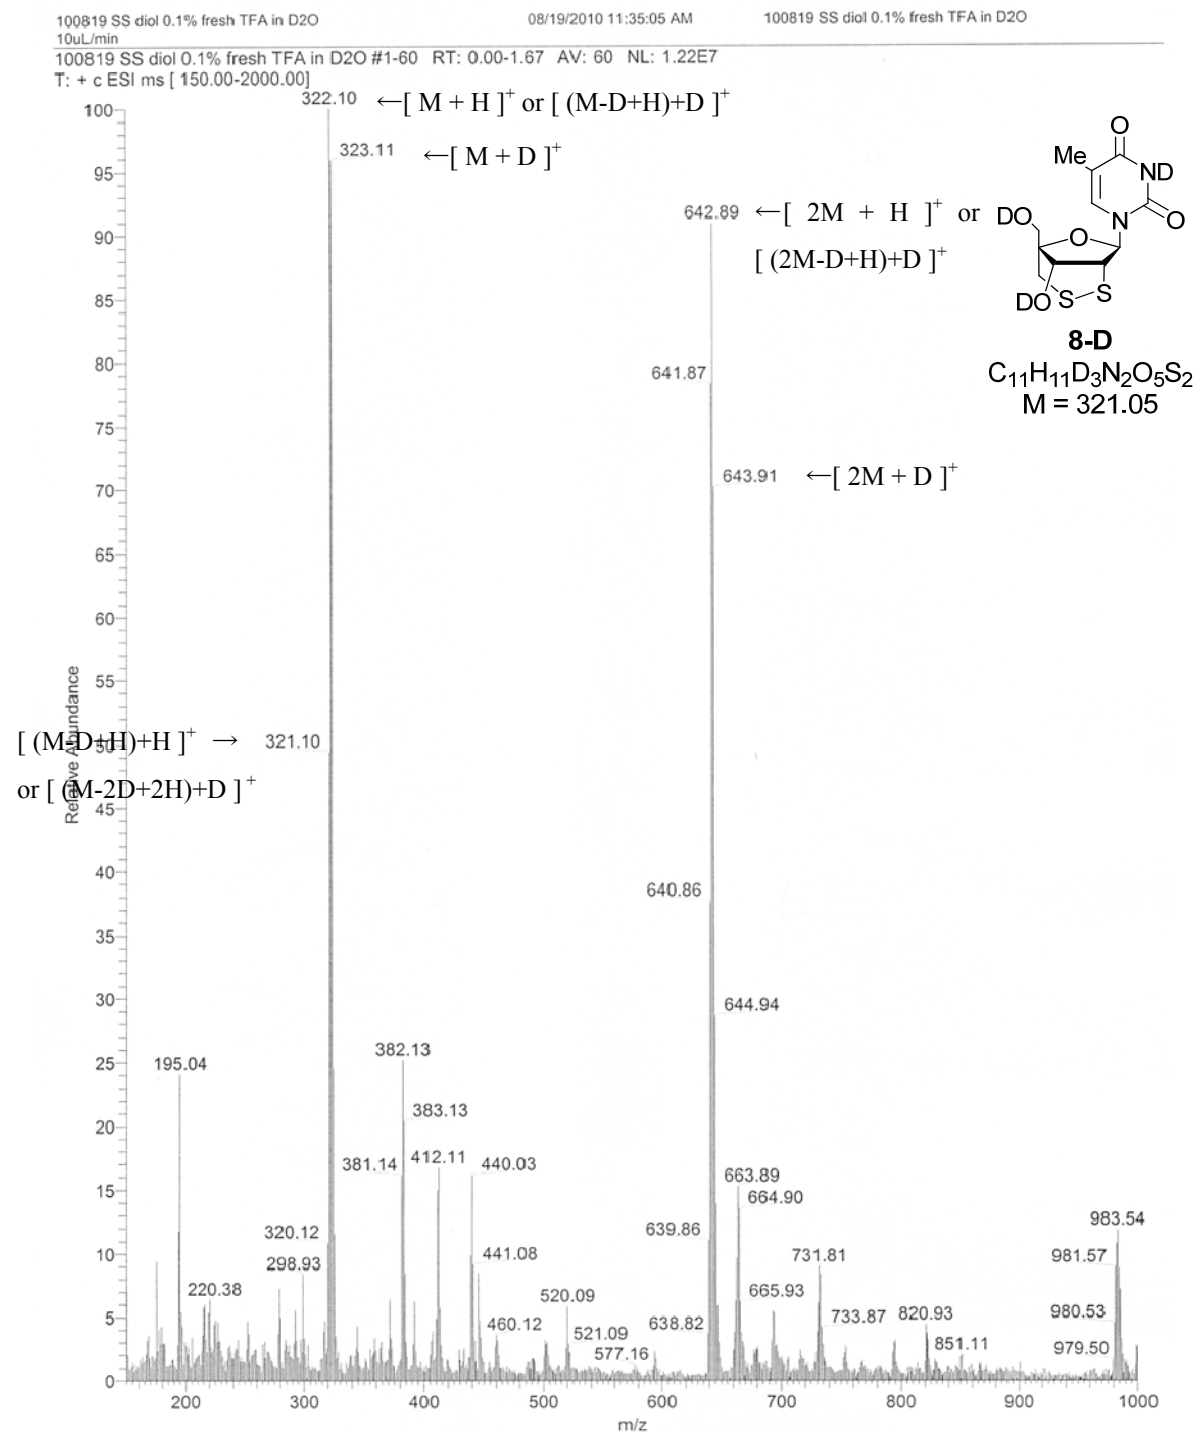

Signals  $m/z$  323 and 644 was observed, which values are good agreement with  $[M+D]^+$ , and  $[2M+D]^+$  for **8-D**. The signals  $m/z$  322 and 643 observed are derived from the **8-D** + proton ( $[M+H]^+$ ) or the compound what one deuterium of **8-D** was replaced to hydrogen + deuterion ( $[(M-D+H)+D]^+$ ), and  $[2M+H]^+$  or  $[(2M-D+H)+D]^+$ .

## 9-D

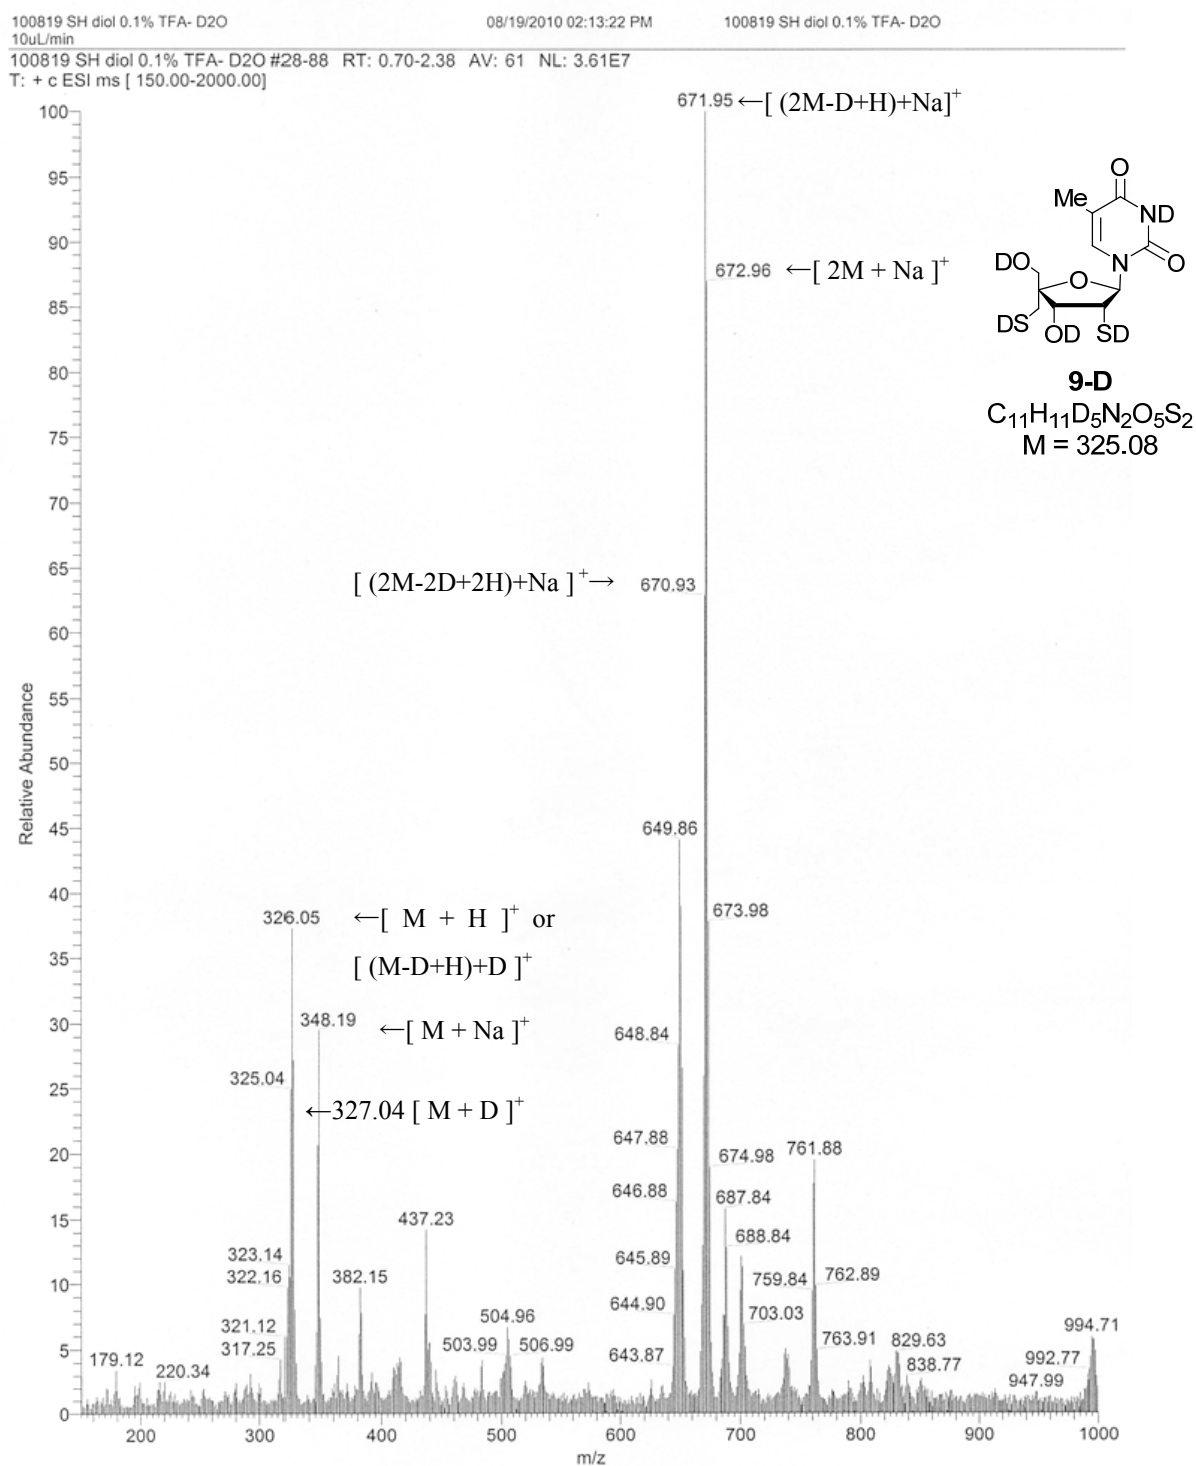

Signals  $m/z$  327, 348 and 673 appeared, which were identical to  $[M+D]^+$ ,  $[M+Na]^+$  and  $[2M+Na]^+$  for **9-D**, respectively. Moreover, the observed signal  $m/z$  326, which is identical to  $[M+H]^+$  or  $[(M-D+H)+D]^+$ ,  $m/z$  671, which is to  $[(2M-2D+2H)+Na]^+$ ,  $m/z$  672, which is to  $[(2M-D+H)+Na]^+$ .

## 6. The selected sugar parameters obtained by X-ray crystallographic analysis

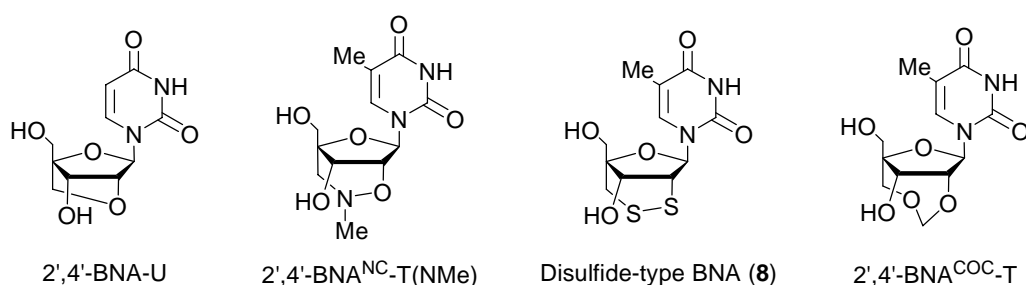

**Fig. S1** Structure of 2',4'-BNA analogues.

**Table S1** Obtained sugar parameters by X-ray crystallographic analysis

| Nucleosides                                   | $P$   | $\nu_{\max}$ | $\delta$ |
|-----------------------------------------------|-------|--------------|----------|
| A-form duplex <sup>1)</sup>                   | 14°   | 38°          | 83°      |
| 2',4'-BNA-U <sup>2)</sup>                     | 17.4° | 56.6°        | 66.2°    |
| 2',4'-BNA <sup>NC</sup> -T(NMe) <sup>3)</sup> | 23.1° | 48.6°        | 75.0°    |
| Disulfide-type BNA ( <b>8</b> )               | 17.8° | 42.1°        | 77.7°    |
| 2',4'-BNA <sup>COC</sup> -T <sup>4)</sup>     | 16.9° | 38.0°        | 77.7°    |

- 1) S. Arnott, D. W. L. Hukins and S. D. Dover, *Biochem. Biophys. Res. Commun.*, 1972, **48**, 1392.
- 2) S. Obika, D. Nanbu, Y. Hari, K. Morio, Y. In, T. Ishida and T. Imanishi, *Tetrahedron Lett.*, 1997, **38**, 8735-8738.
- 3) S. M. A. Rahman, S. Seki, S. Obika, H. Yoshikawa, K. Miyashita and T. Imanishi, *J. Am. Chem. Soc.*, 2008, **130**, 4886-4896.
- 4) Y. Hari, S. Obika, R. Ohnishi, K. Eguchi, T. Osaki, H. Ohishi and T. Imanishi, *Bioorg. Med. Chem.*, 2006, **14**, 1029-1038.

## 7. Parameters of optimized monomer 9

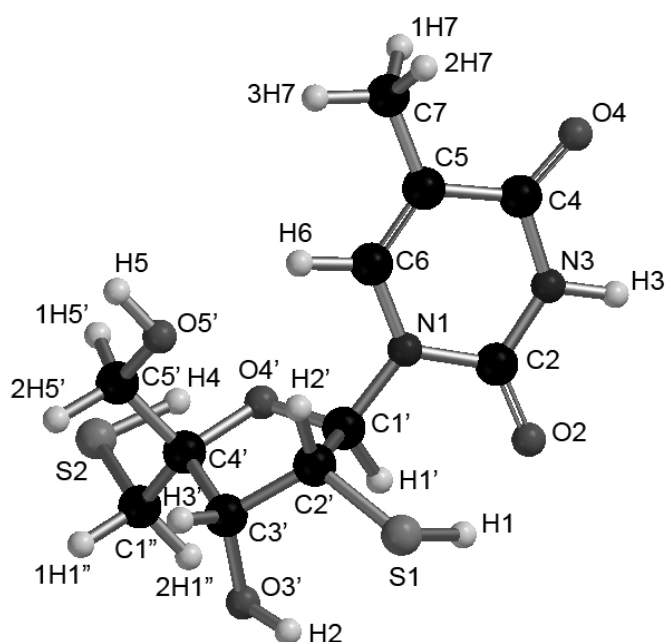

- torsion angles

$$v_0 = C4'-O4'-C1'-C2' = -24.0^\circ$$

$$v_1 = O4'-C1'-C2'-C3' = -38.0^\circ$$

$$v_2 = C1'-C2'-C3'-C4' = -36.7^\circ$$

$$v_3 = C2'-C3'-C4'-O4' = 23.7^\circ$$

$$v_4 = C3'-C4'-O4'-C1' = -0.1^\circ$$

$$\delta = O3'-C3'-C4'-C5' = 147.6^\circ$$

- pseudorotation phase angle  $P = 161.5^\circ$

- maximum torsion angle  $v_{\max} = 38.7^\circ$

**Fig. S2** Optimized structures, endocyclic sugar torsion angles  $v_0$ - $v_4$ , maximum torsion angle  $v_{\max}$  and pseudorotation phase angle  $P$ . The values of  $P$  and  $v_{\max}$  are calculated as follows:  $\tan P = (v_4 + v_1 - v_3 - v_0) / (2 \cdot v_2 \cdot (\sin 36^\circ + \sin 72^\circ))$ ;  $v_{\max} = v_2 / \cos P$ . The calculation was carried out using Spartan '06 for Windows (Wavefunction Inc.) and optimized using Geometry Optimization (HF/6-31G\*).
